# Supplementary material for: A convenient domino Ferrier rearrangement-intramolecular cyclization for the synthesis of novel benzopyran-fused pyranoquinolines
Source: Royal Society of Chemistry journal article supplement (doi:10.1039/c5ob02536b), 2016-01-01
Supplement: c5ob02536b2.pdf [file c5ob02536b2.pdf]

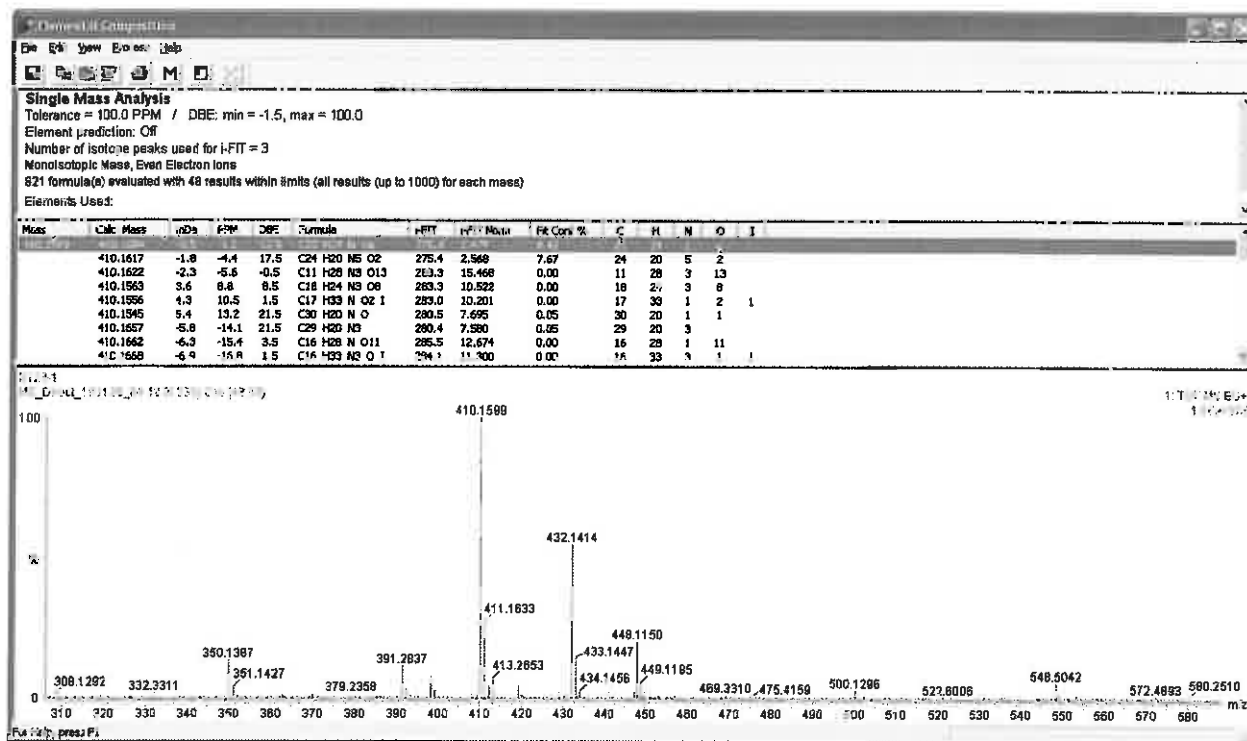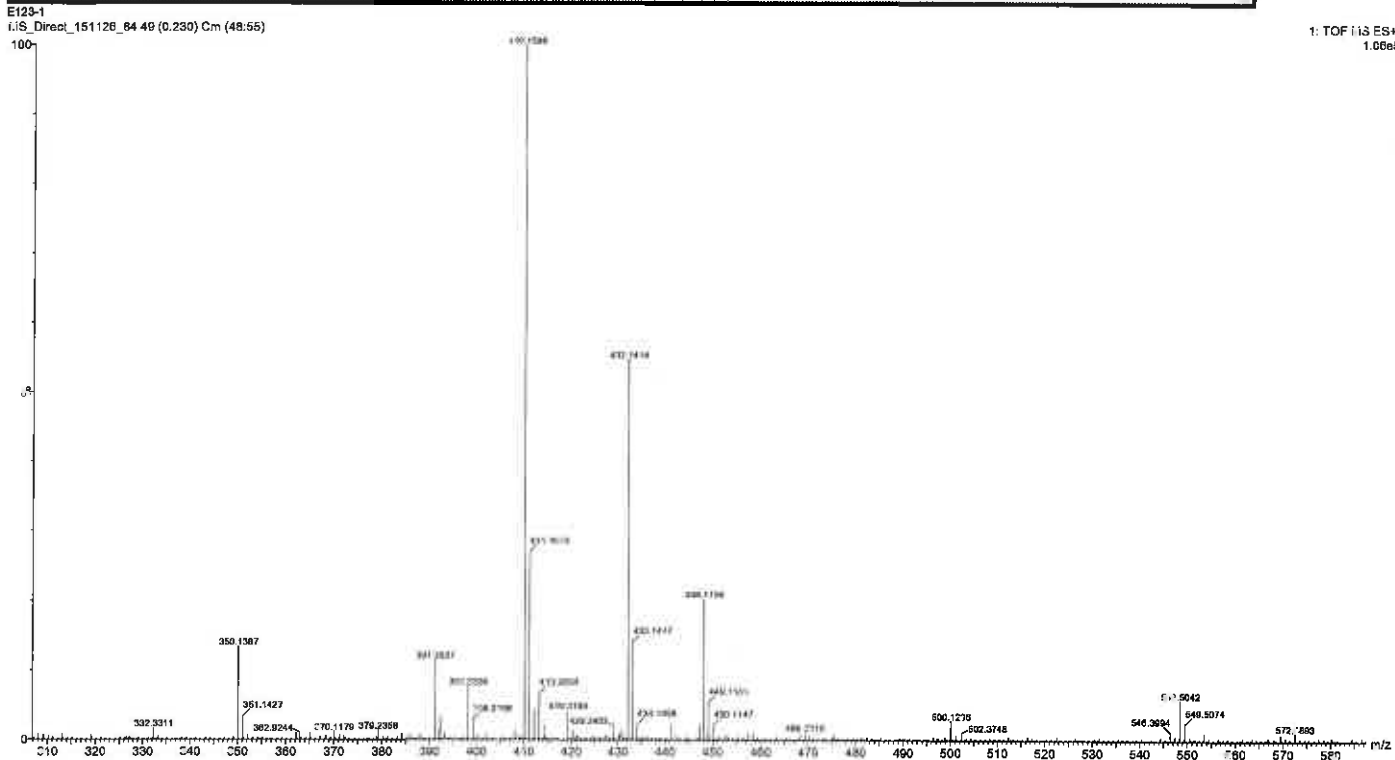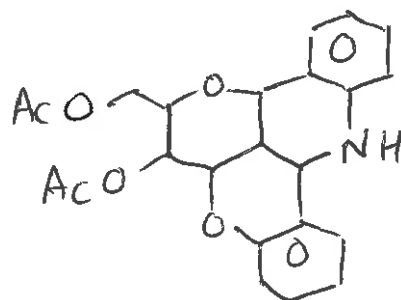

18a

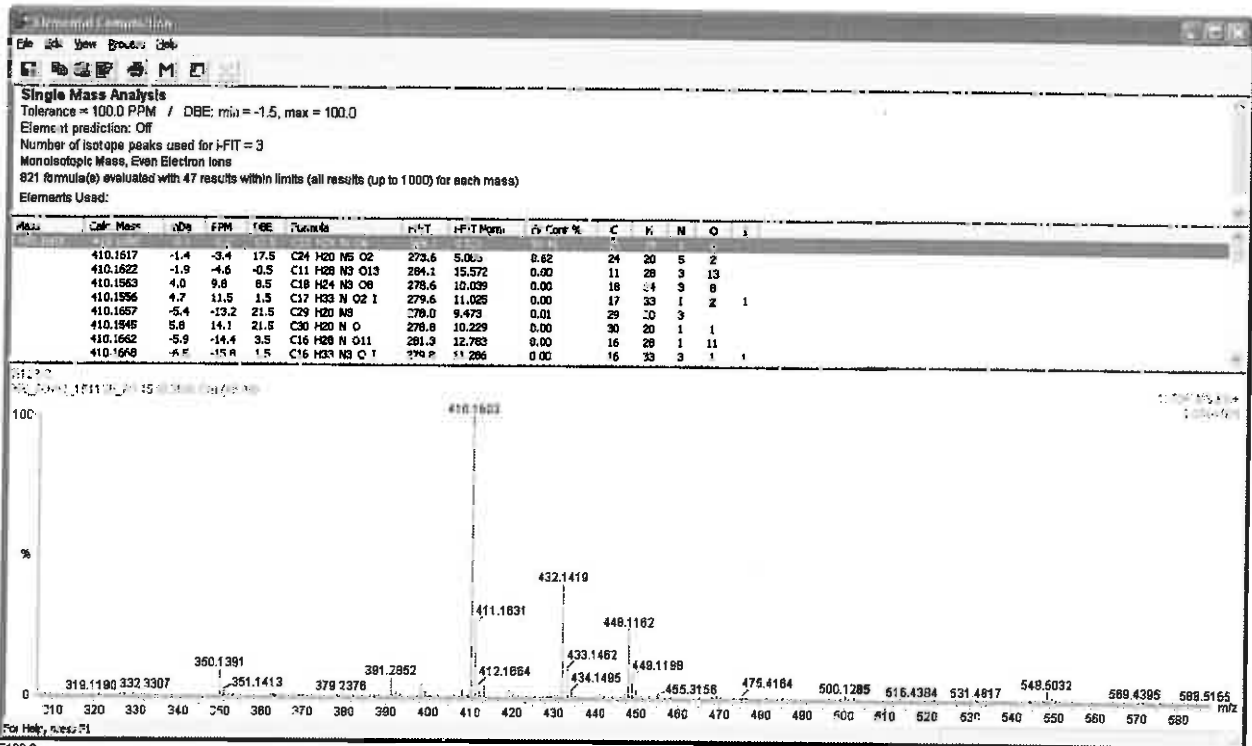

E123-2  
MS\_Direct\_151126\_85\_45 (0.209) Cm (40.49)

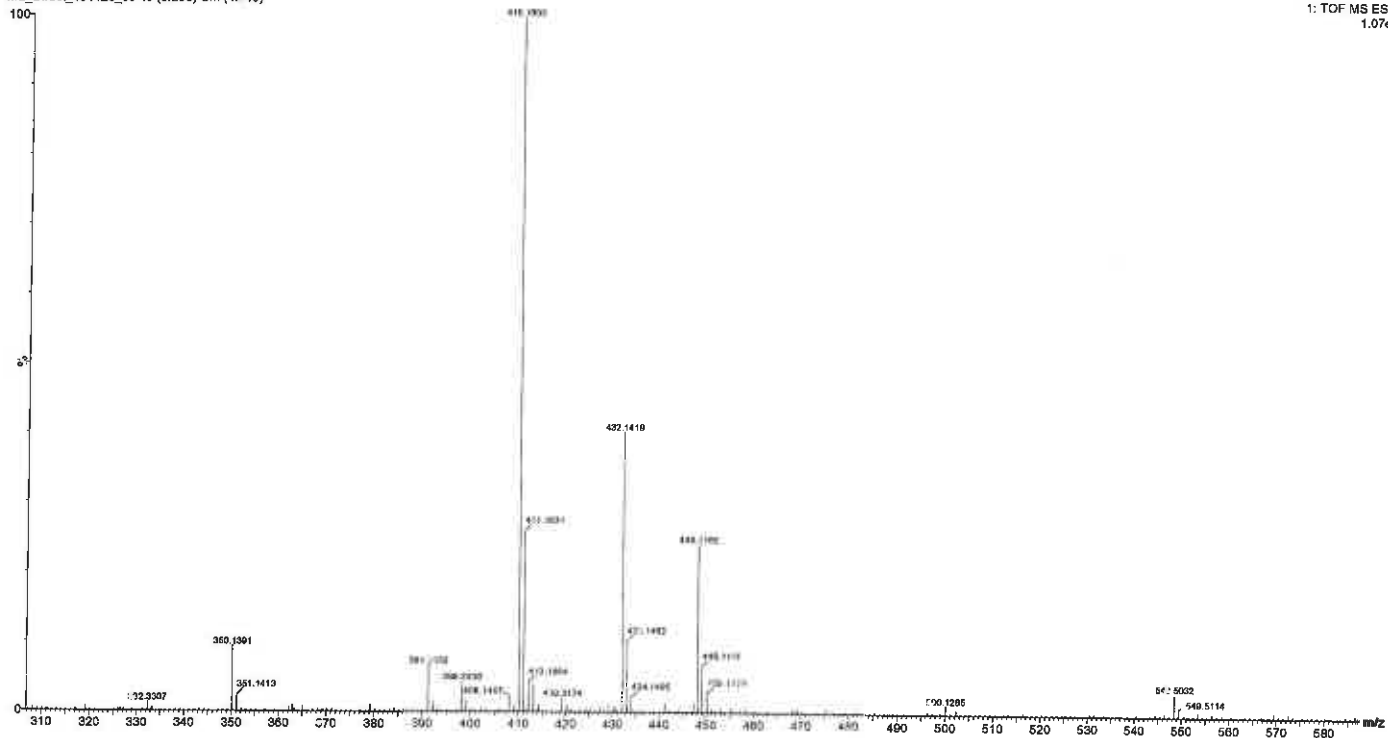

1: TOF MS ES+  
1.07e5

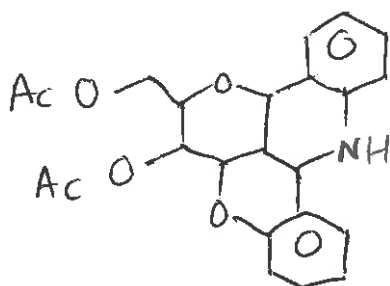



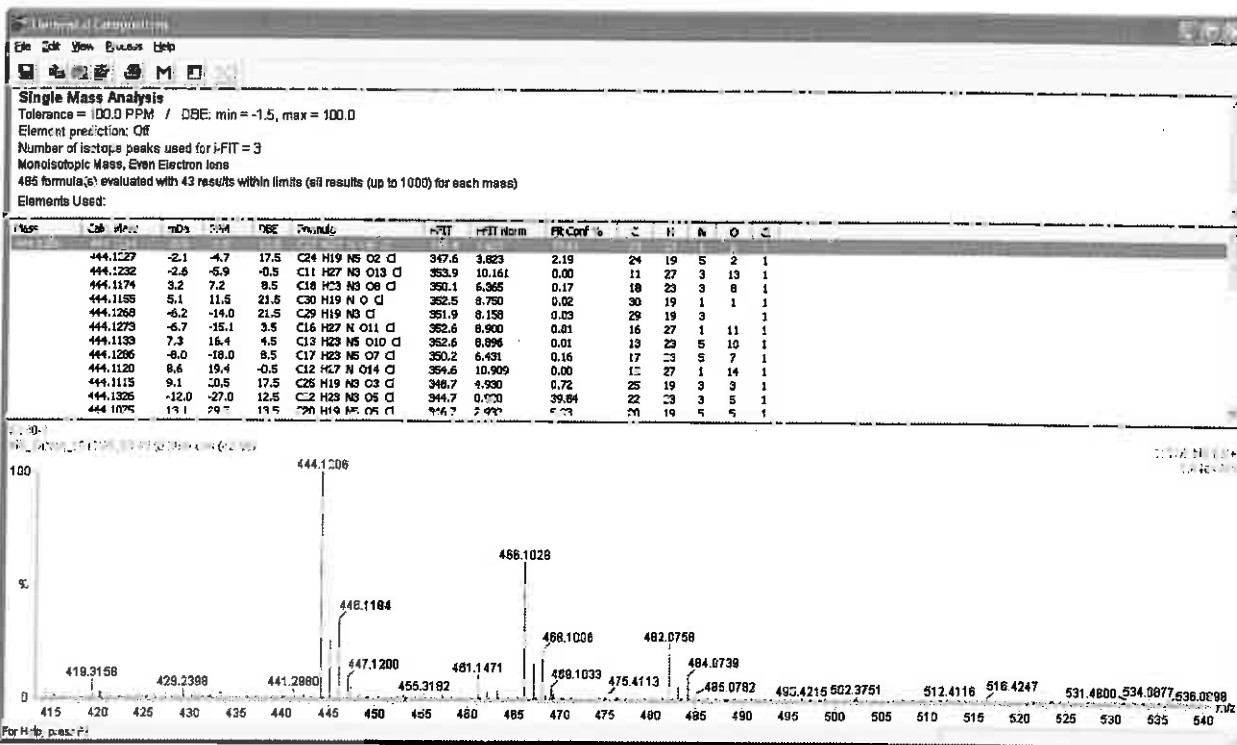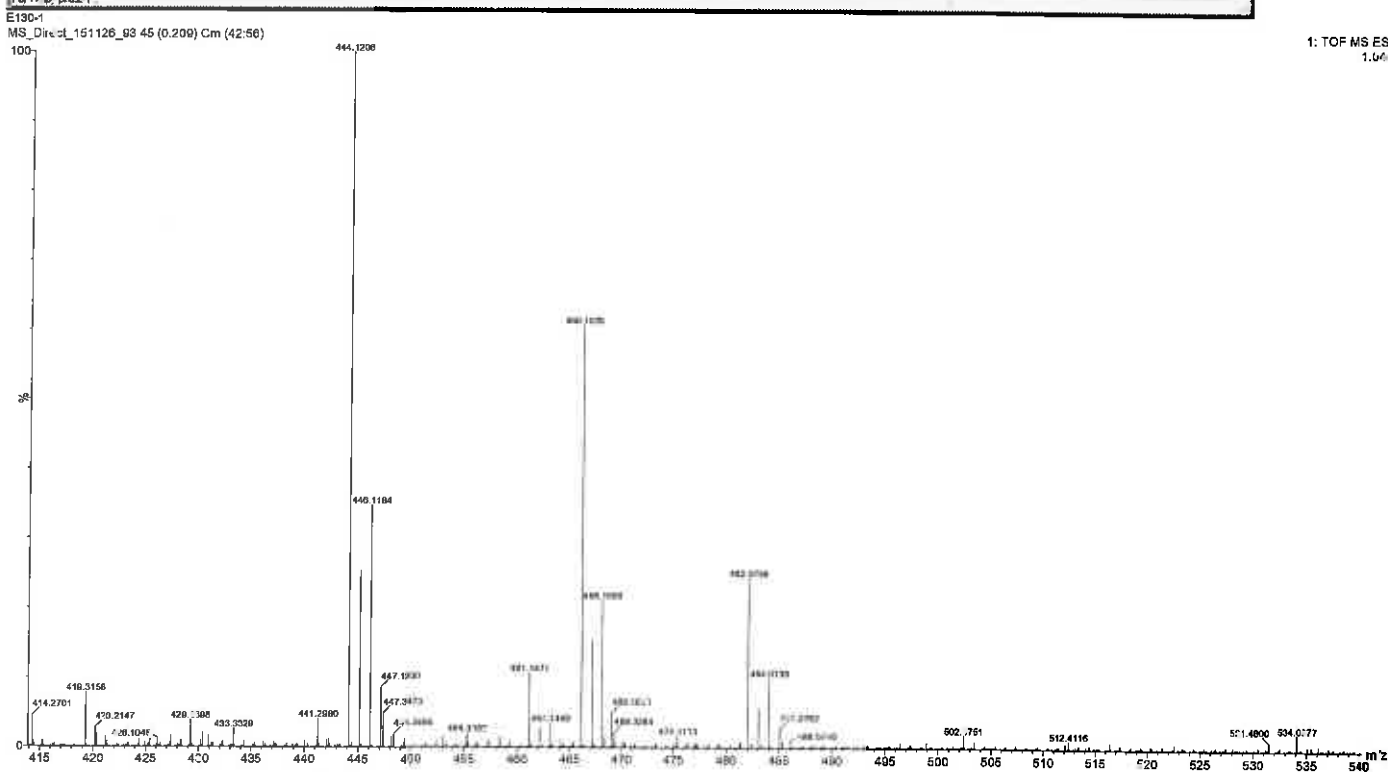

1: TOF MS ES+  
1.00e5

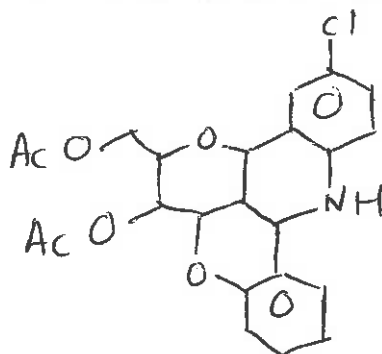

18 C

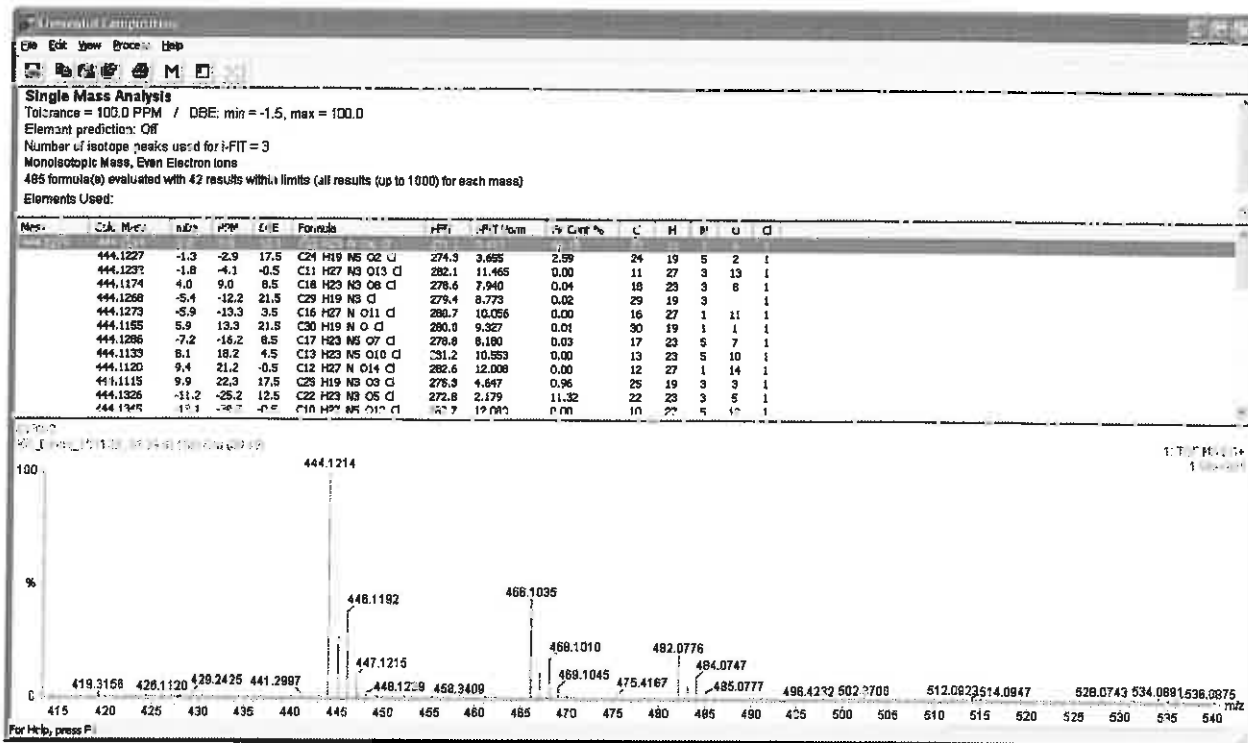

E130-2  
MS\_Direct\_151126\_04 39 (0.186) Cm (CR:45)

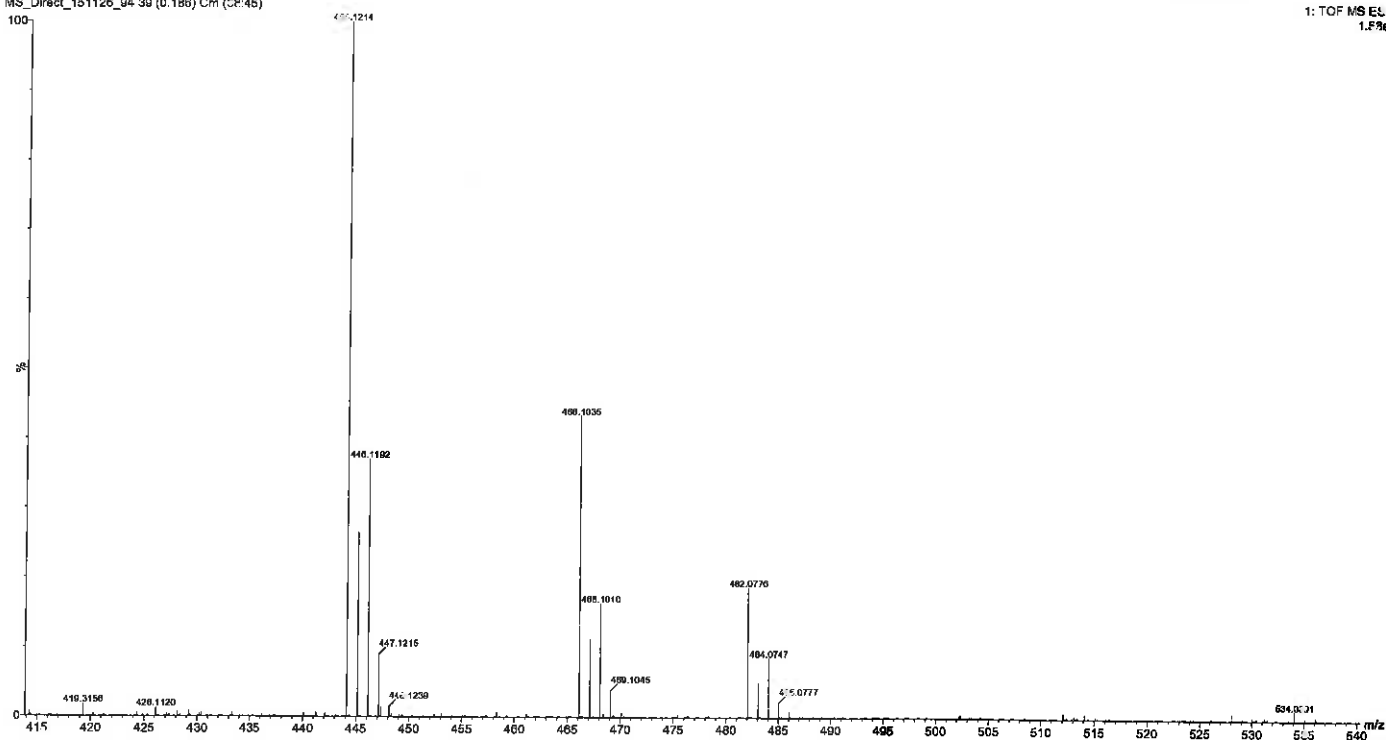

1: TOF MS ES+  
1.F966

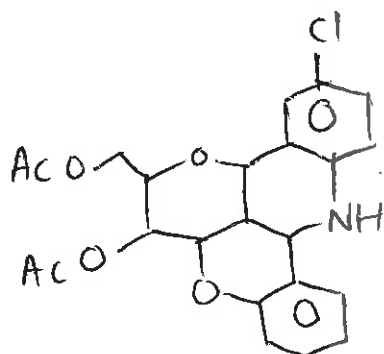

18 C



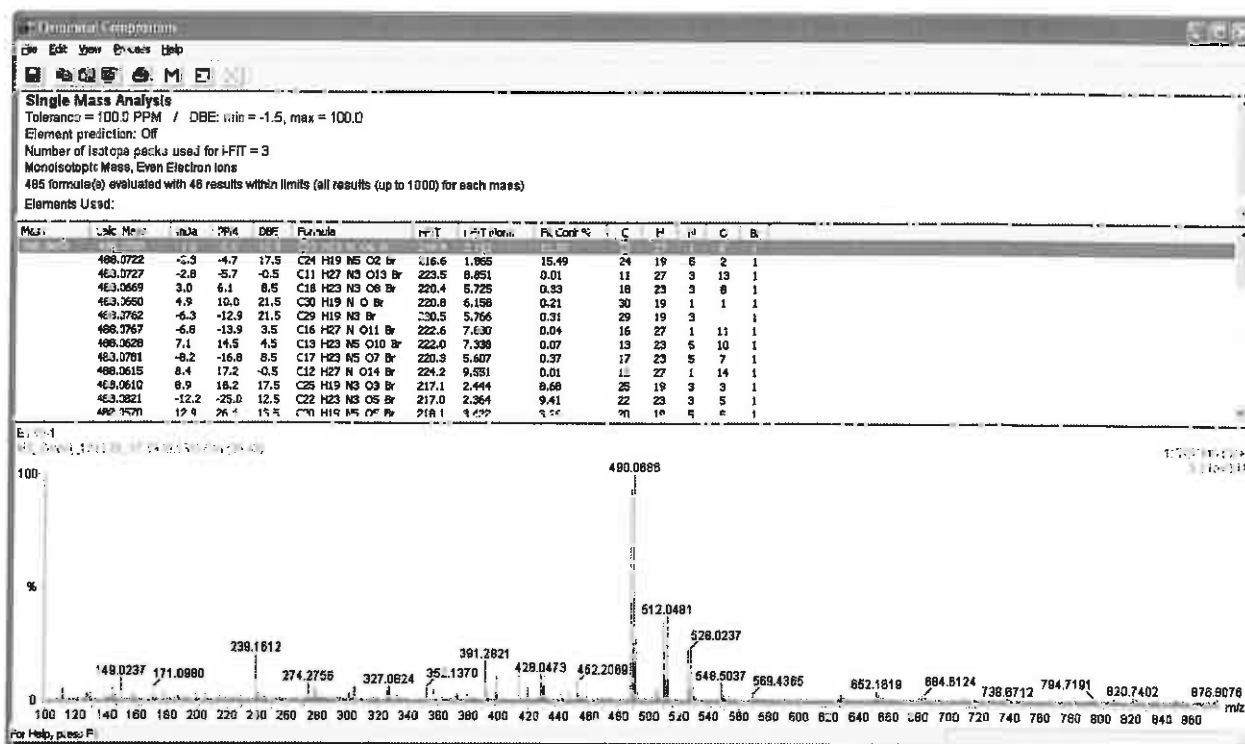

E135-1  
MS\_Direct\_151120\_07\_39 (0.11e4) Cm (36.40)

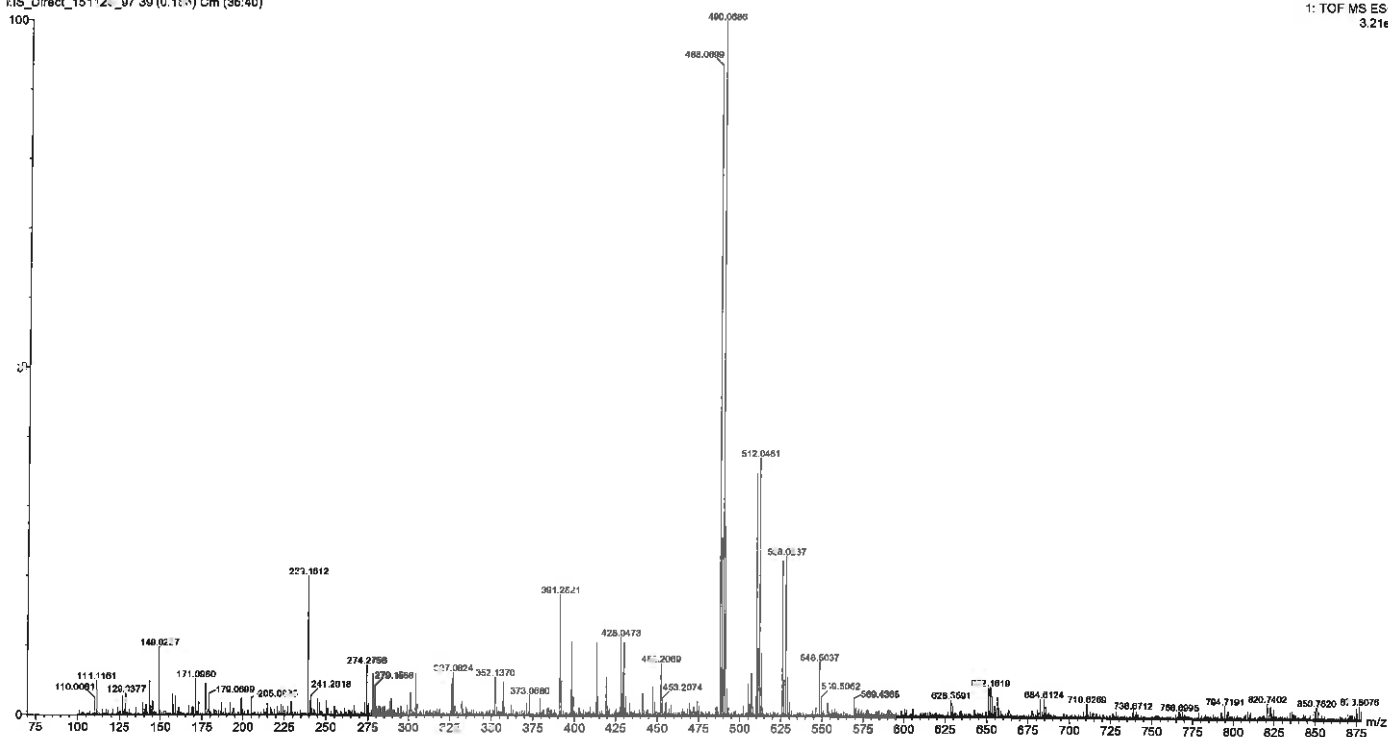

1: TOF MS ES+  
3.21e4

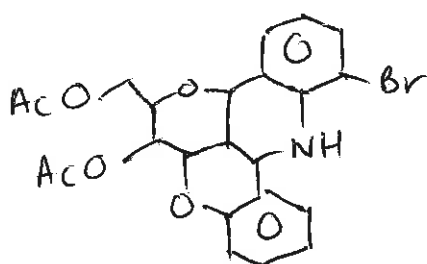

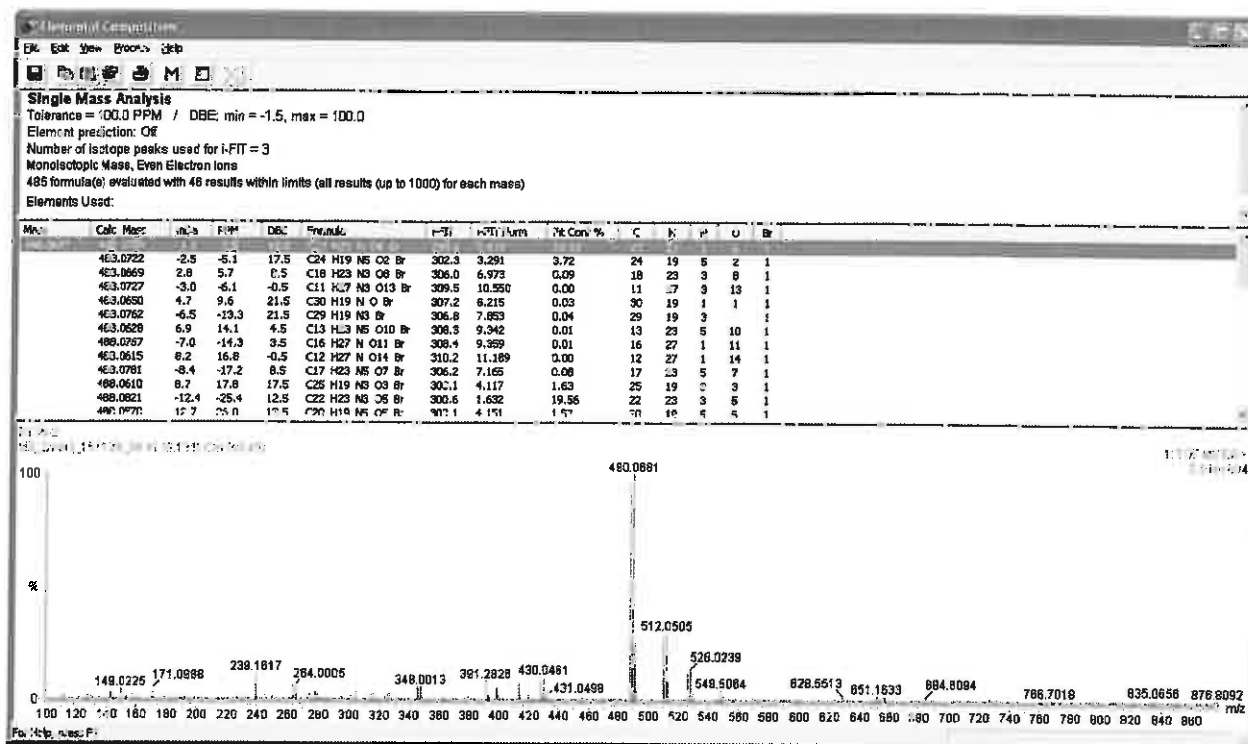

E135-2  
MS\_Direct\_151126\_98 41 (0.194) Cm (40:45)

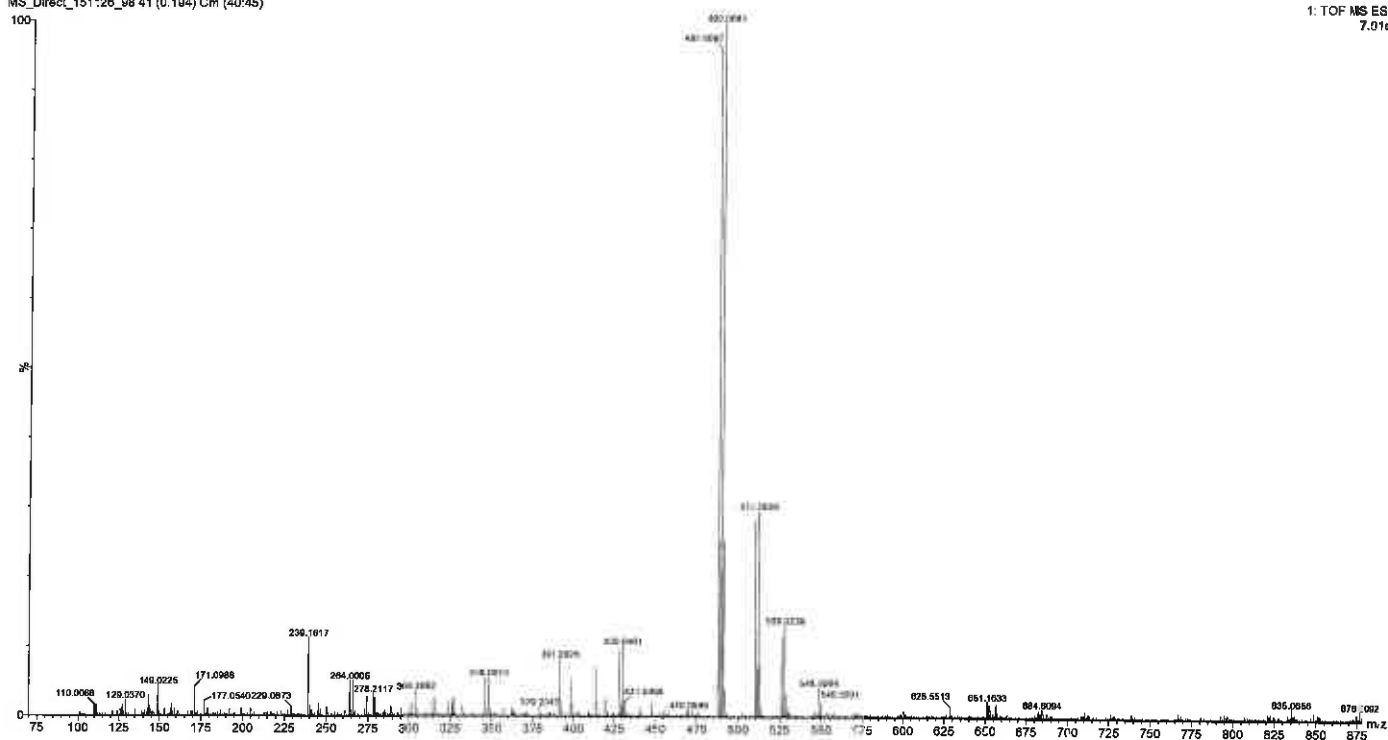

1: TOF MS ES+  
7.01e4

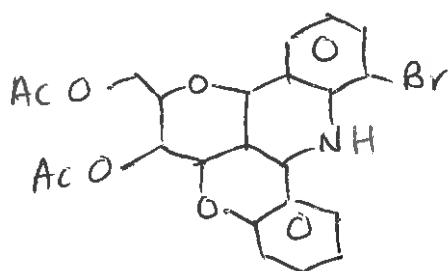

18 e.





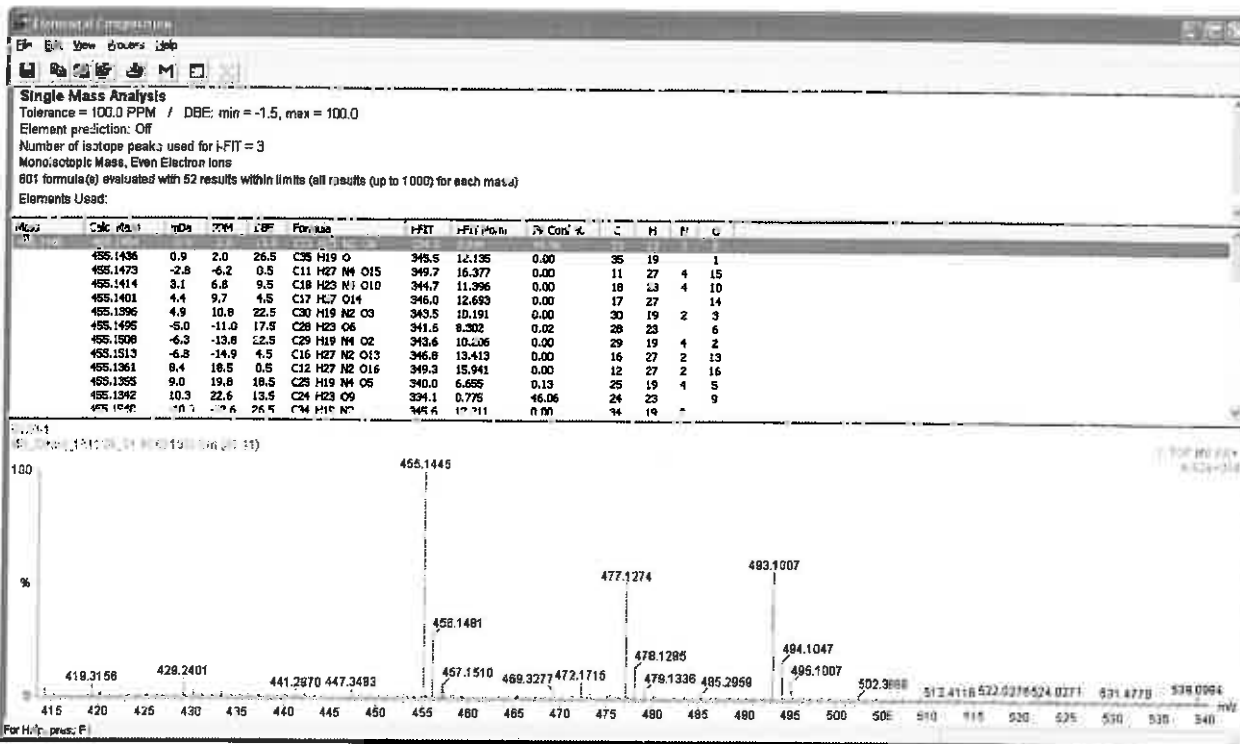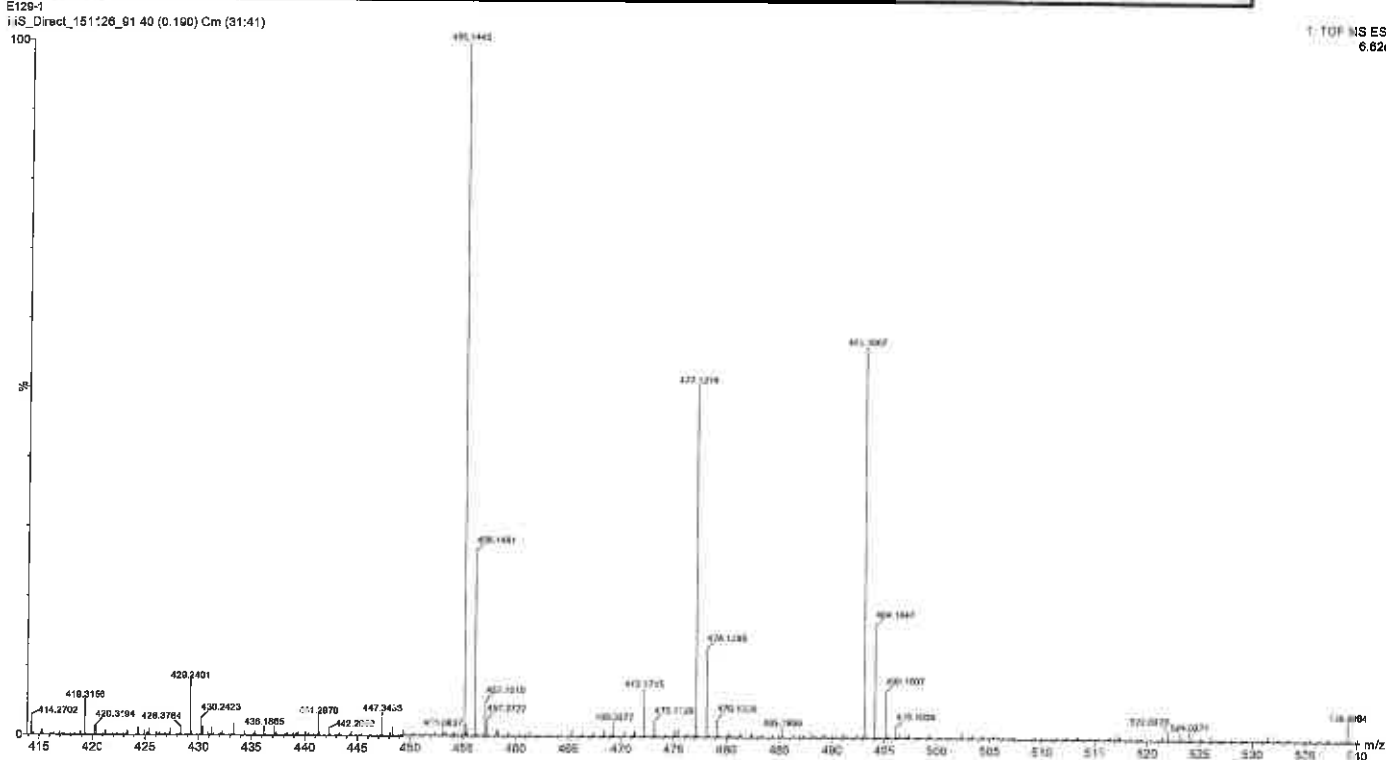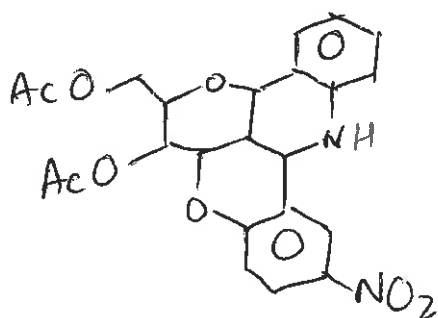

18 h.

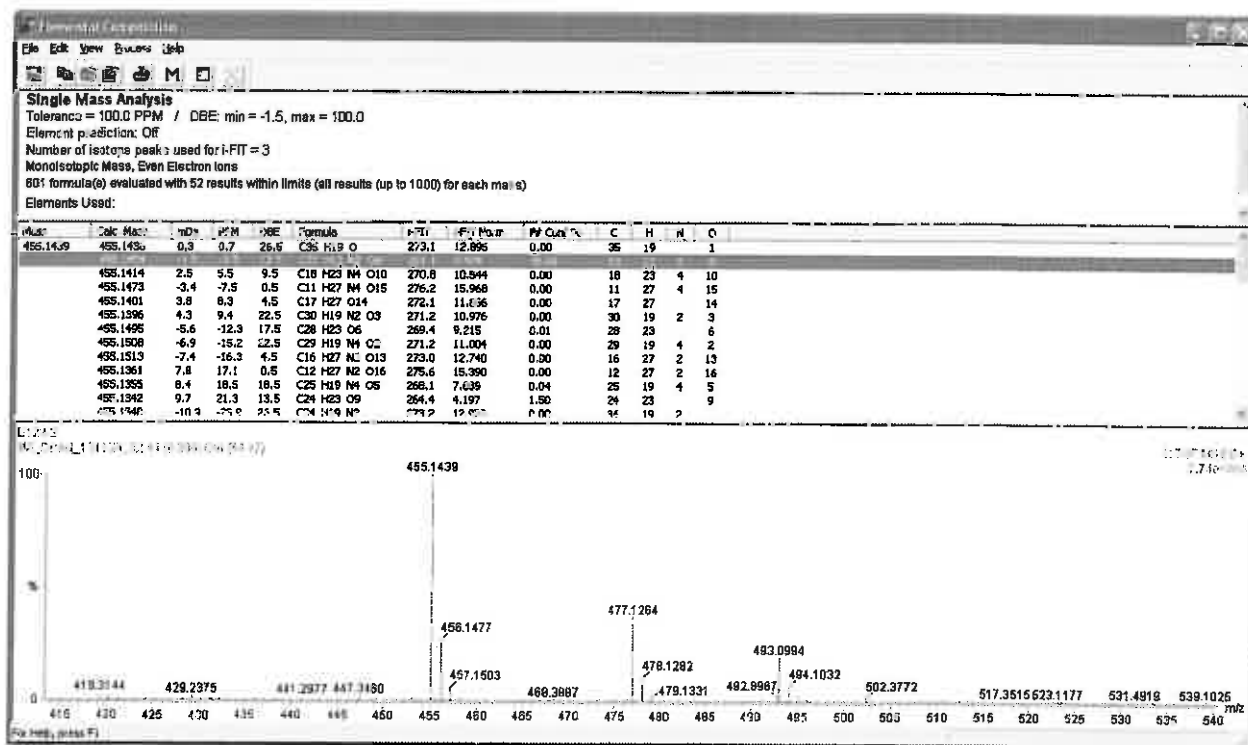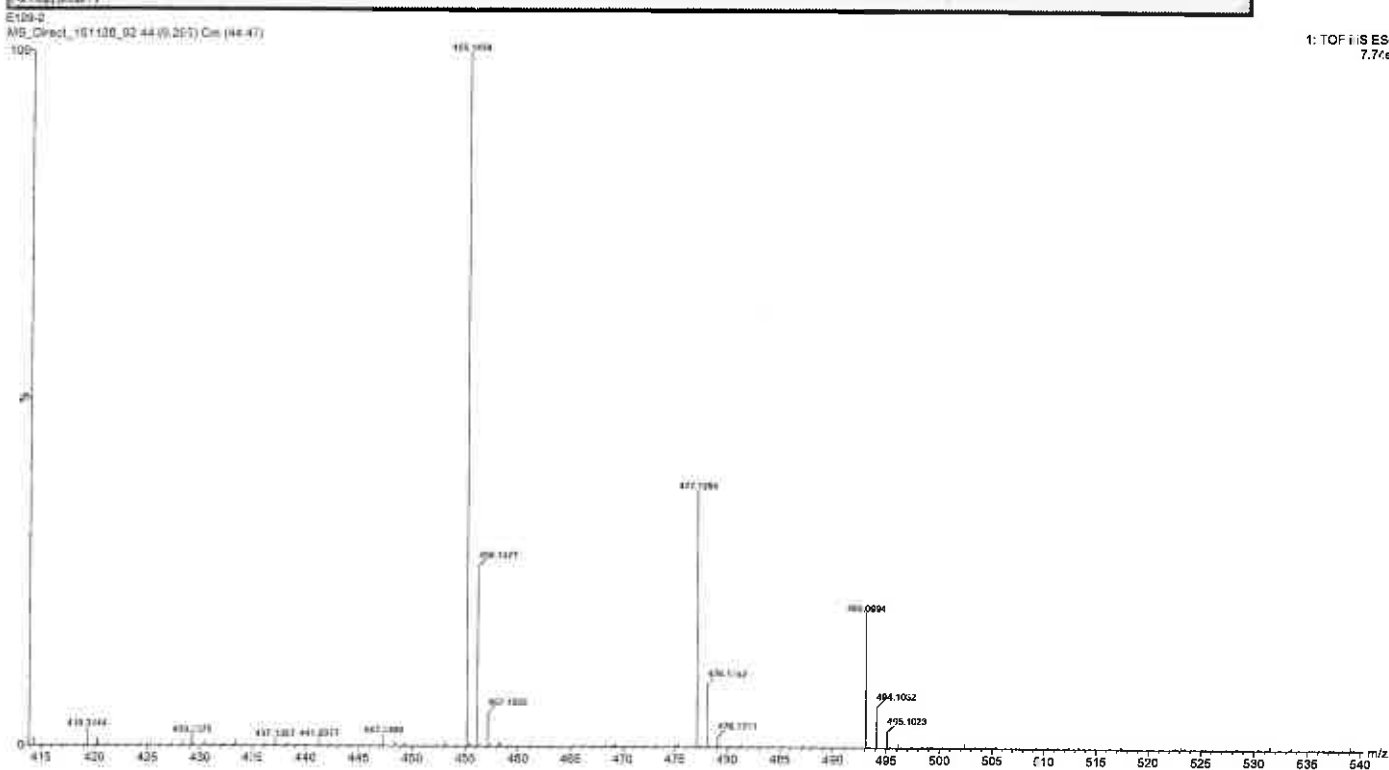

1: TOF MS ES+  
7.7/e4

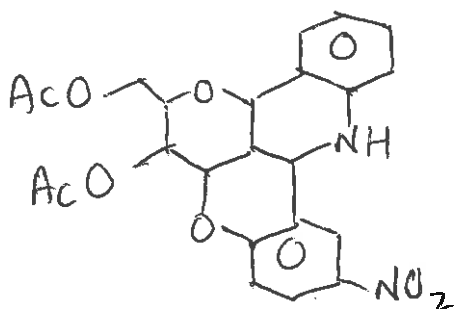

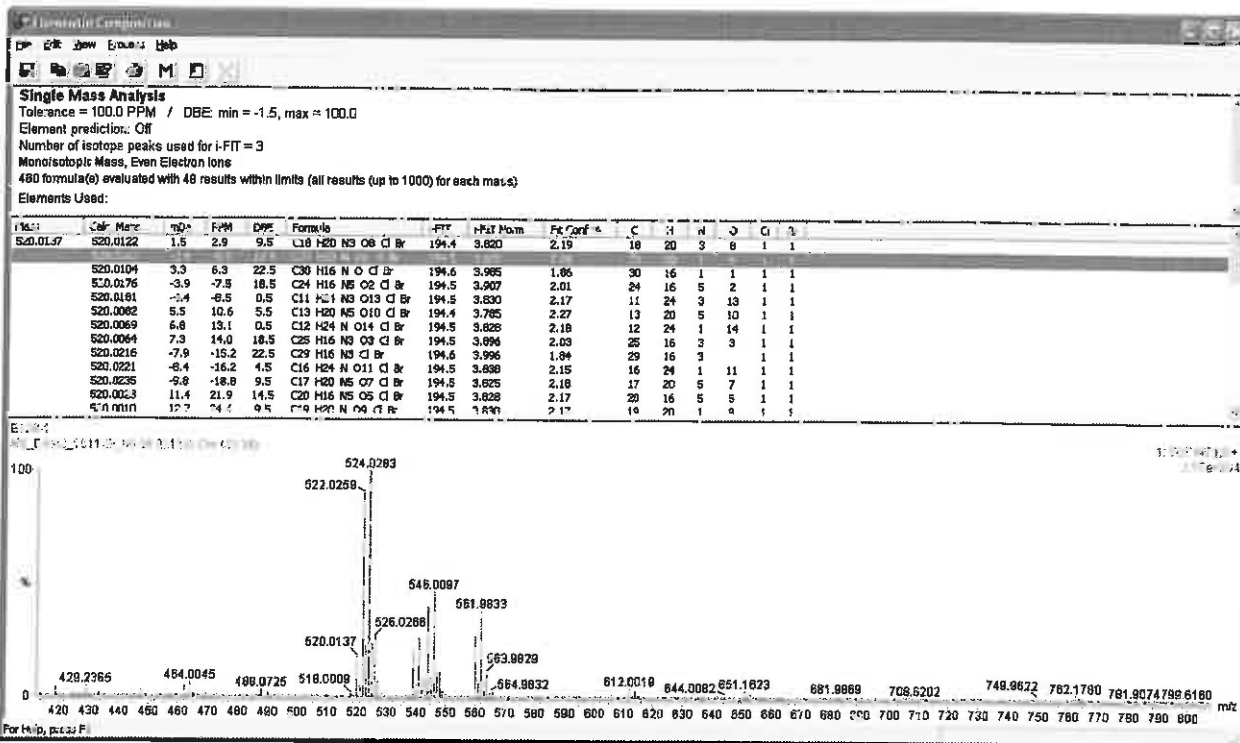

For MS/MS, see 32 F1  
E128-1  
MS\_Direct\_151126\_88\_38 (0.169) Cm (32:38)

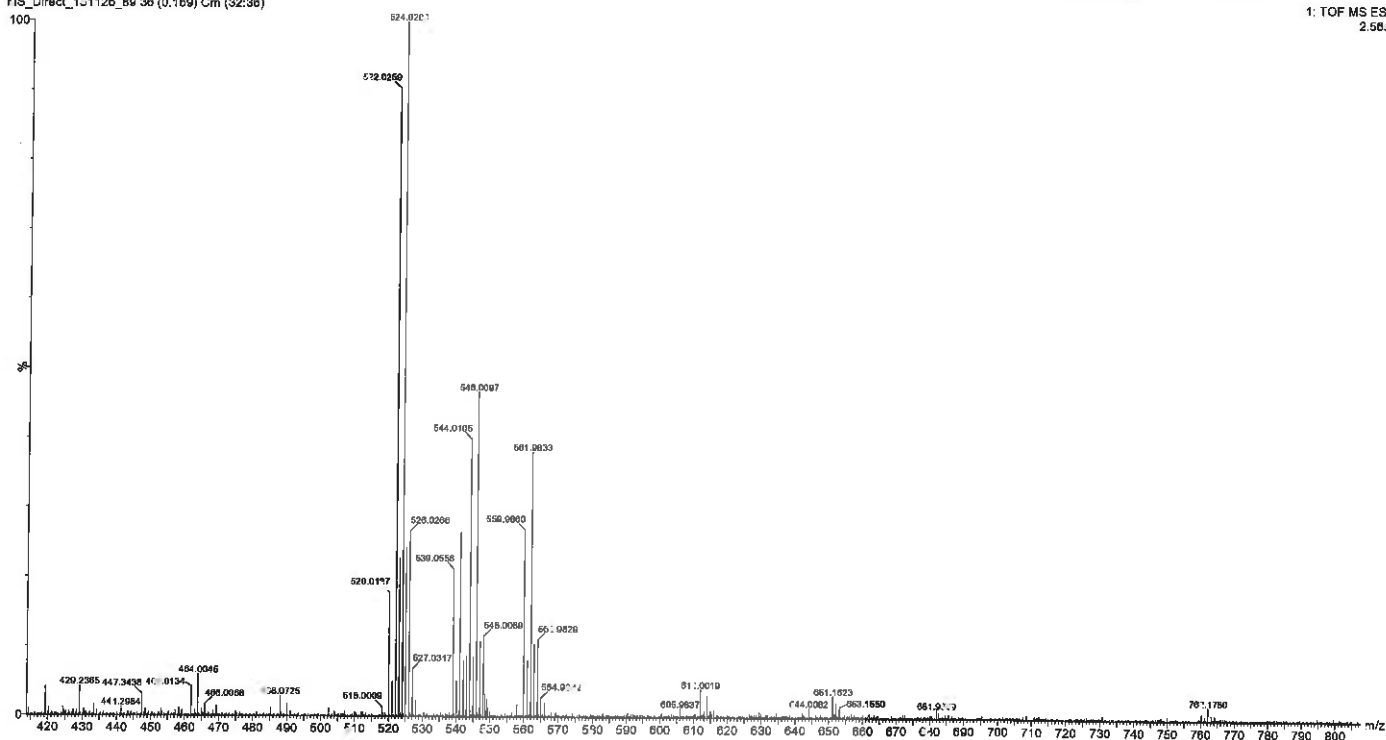

1: TOF MS ES+  
2.5834

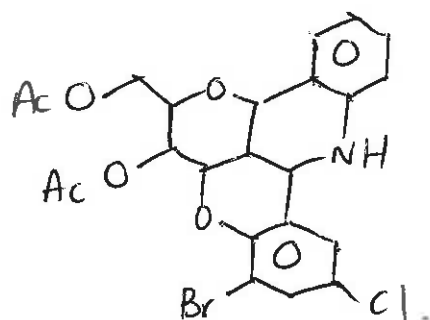

18 i

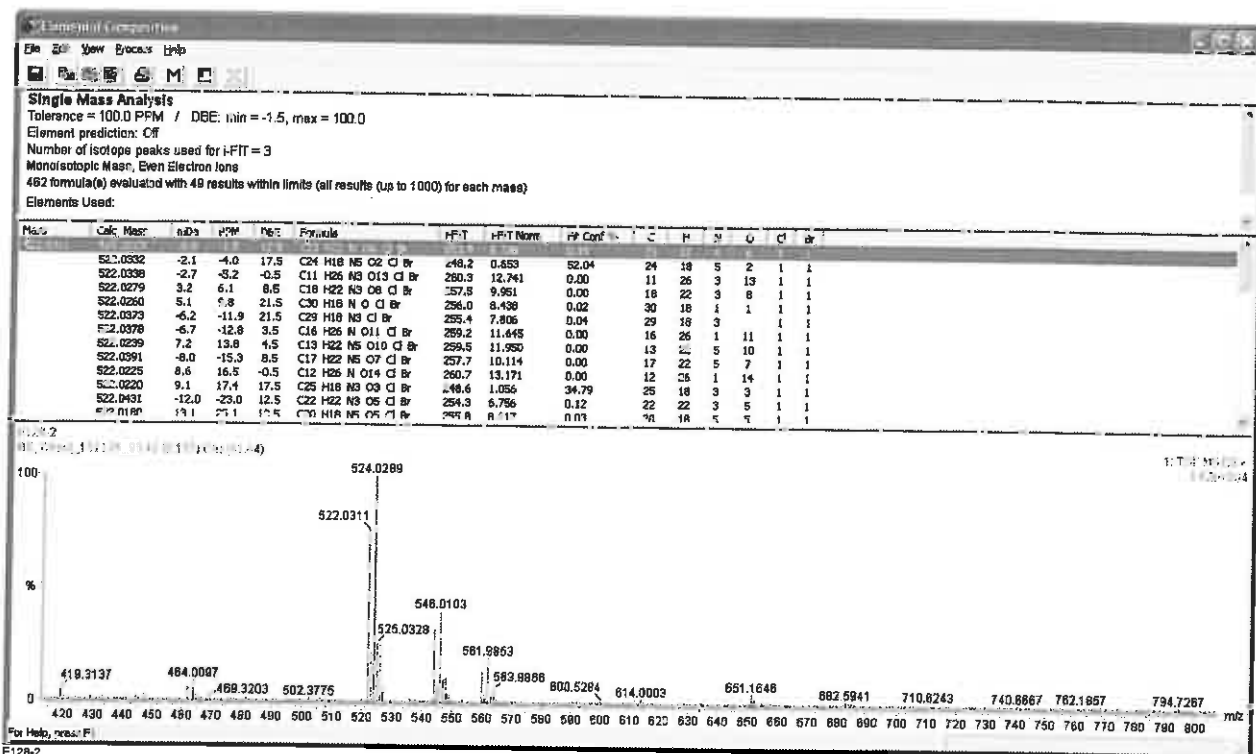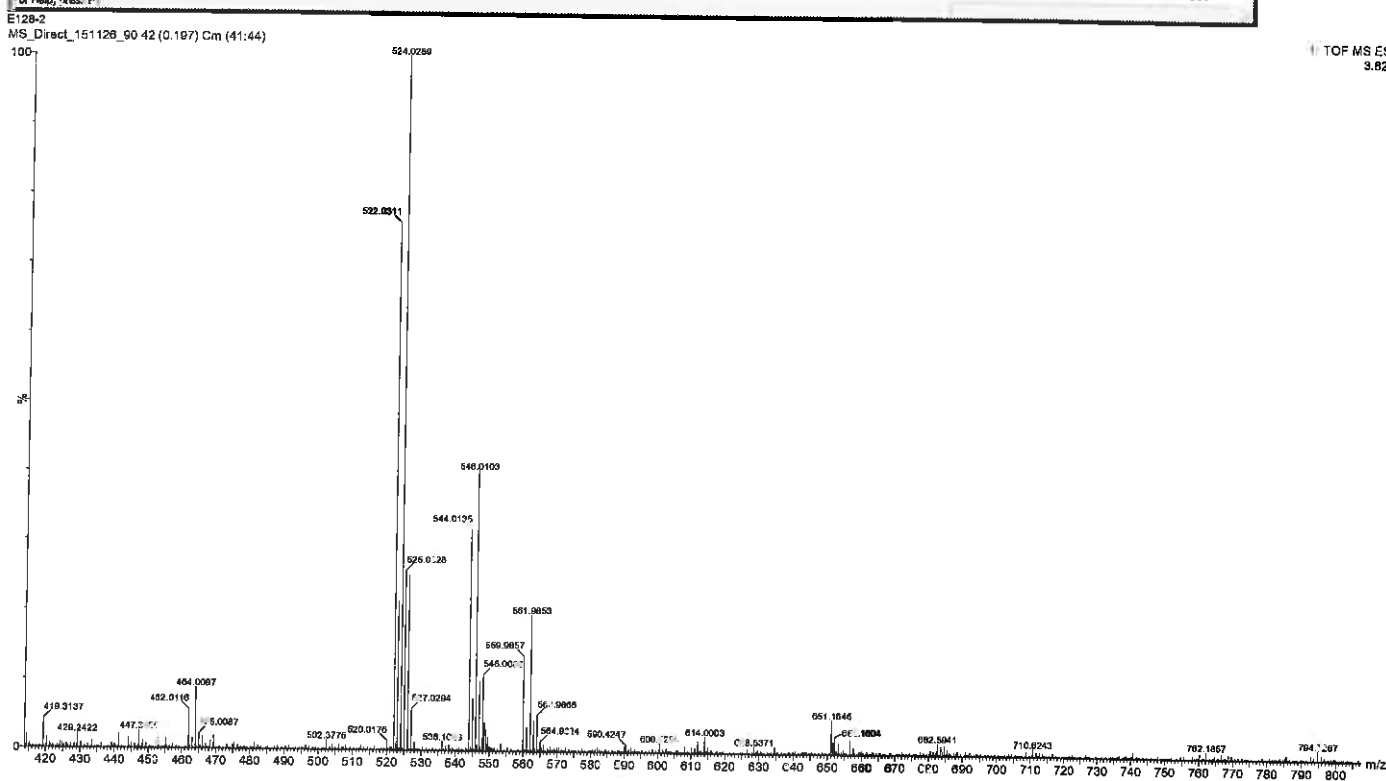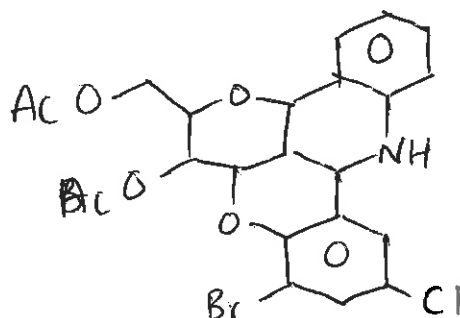

18 i

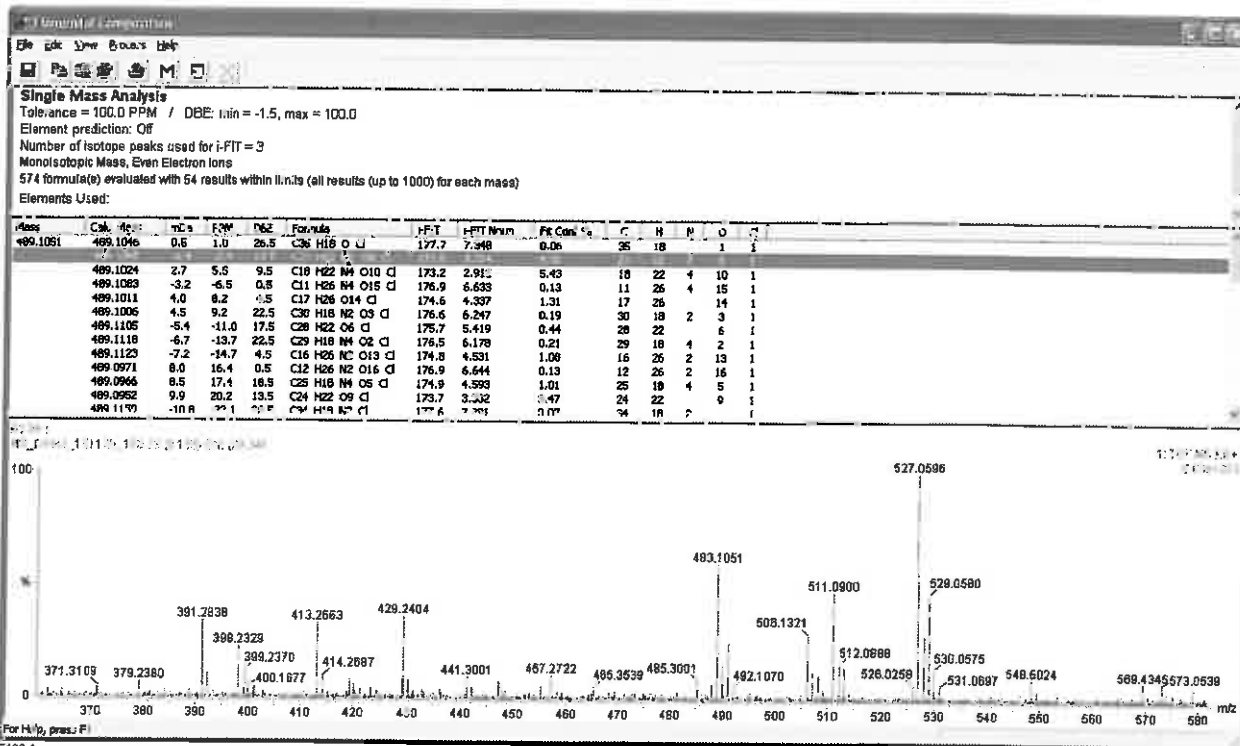

1: TOF MS ES+  
5.85.3

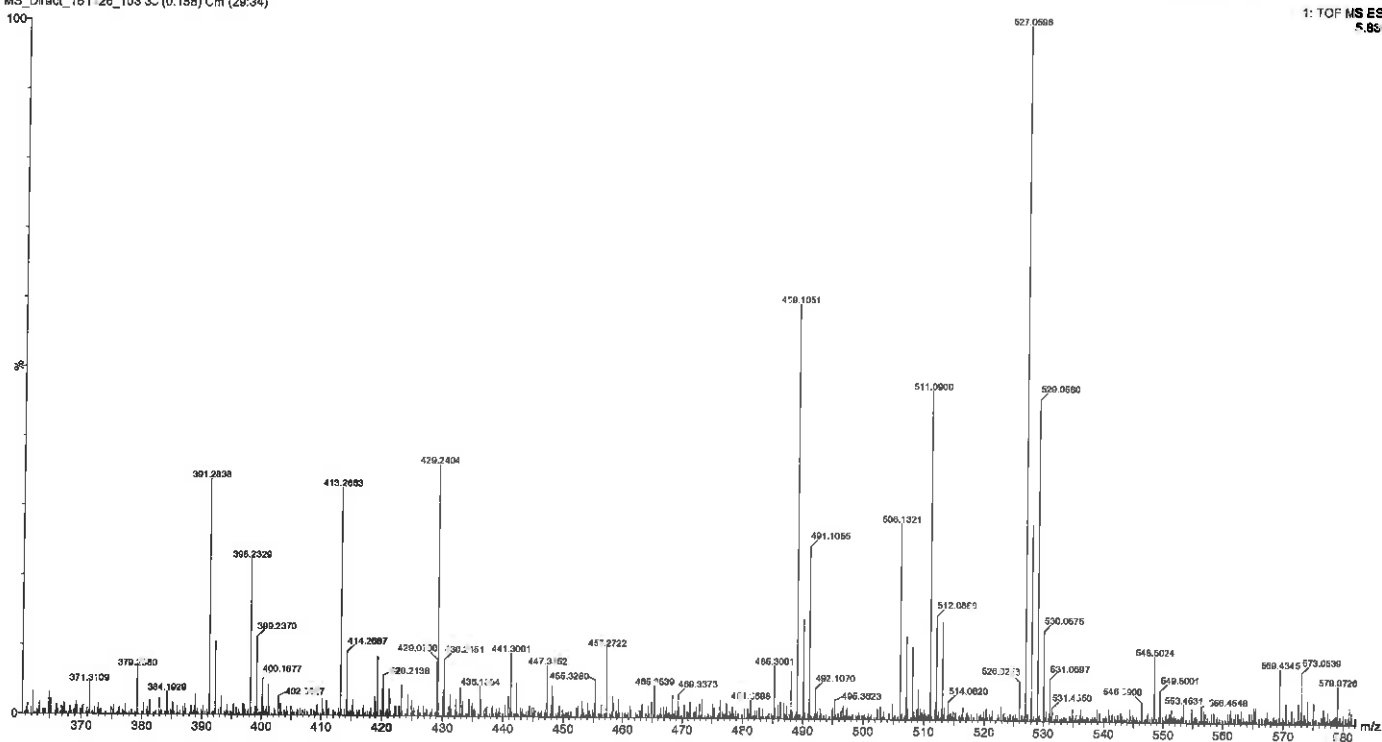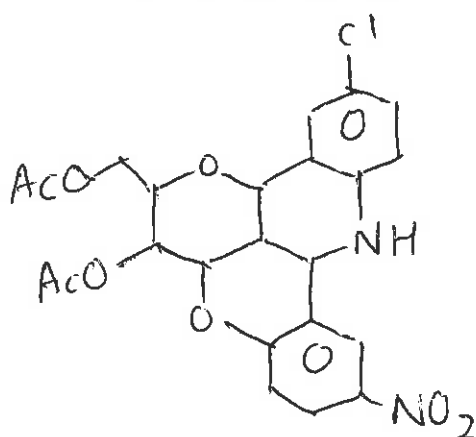

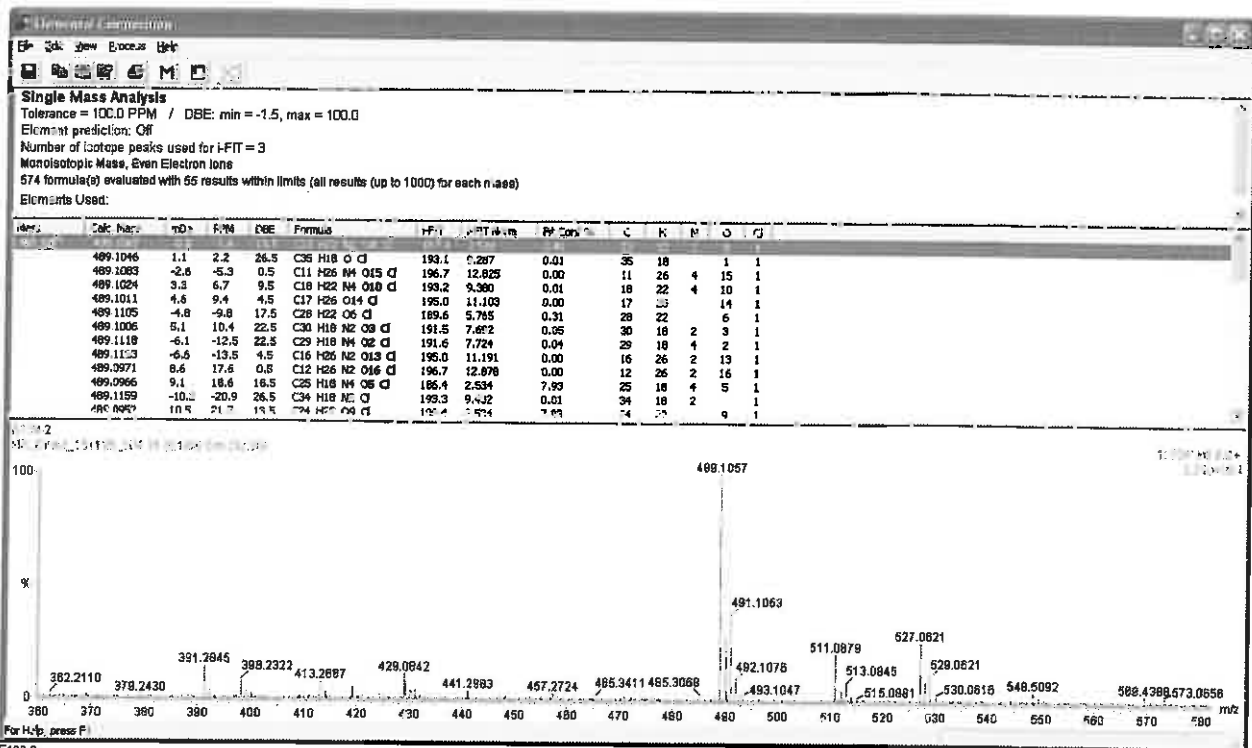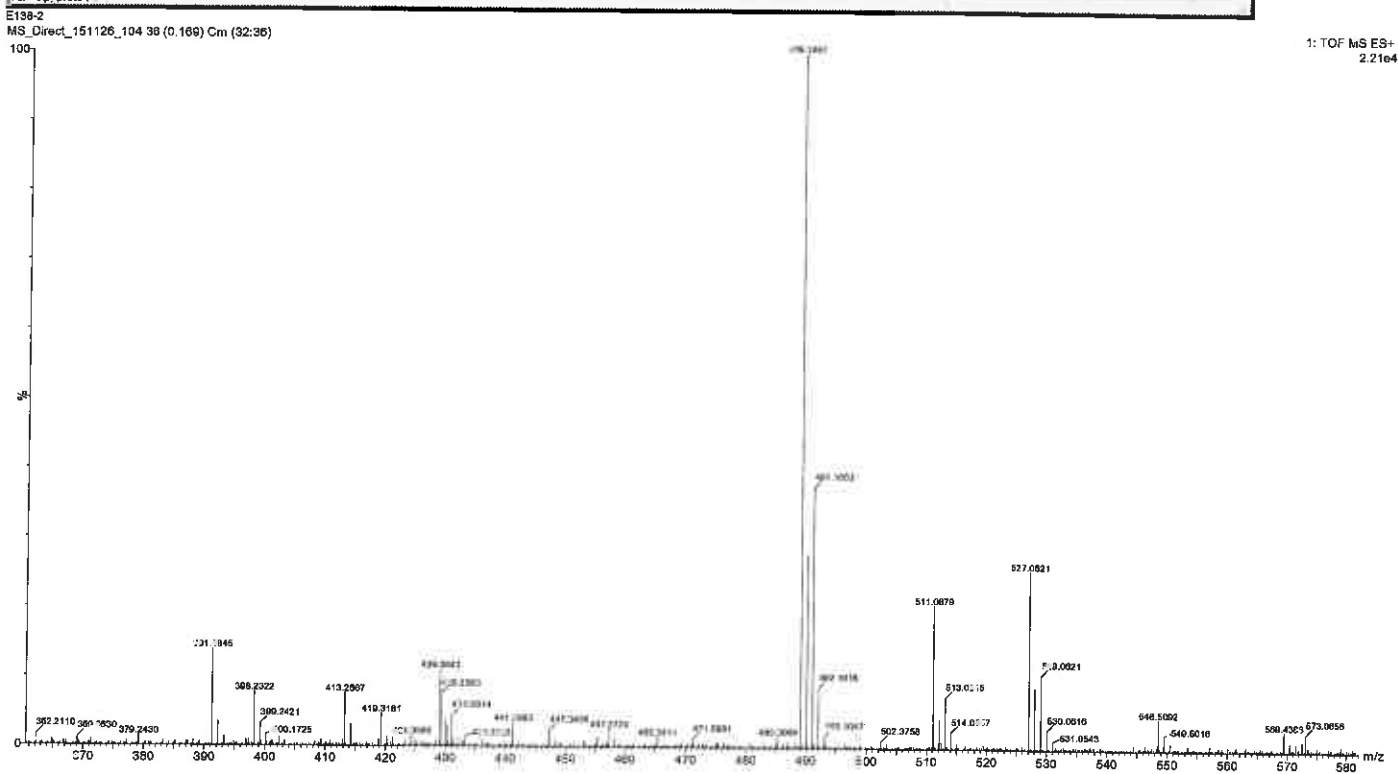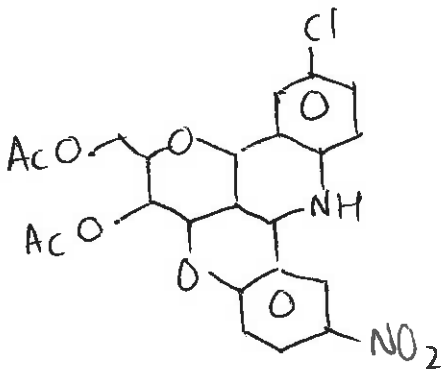

18 K.

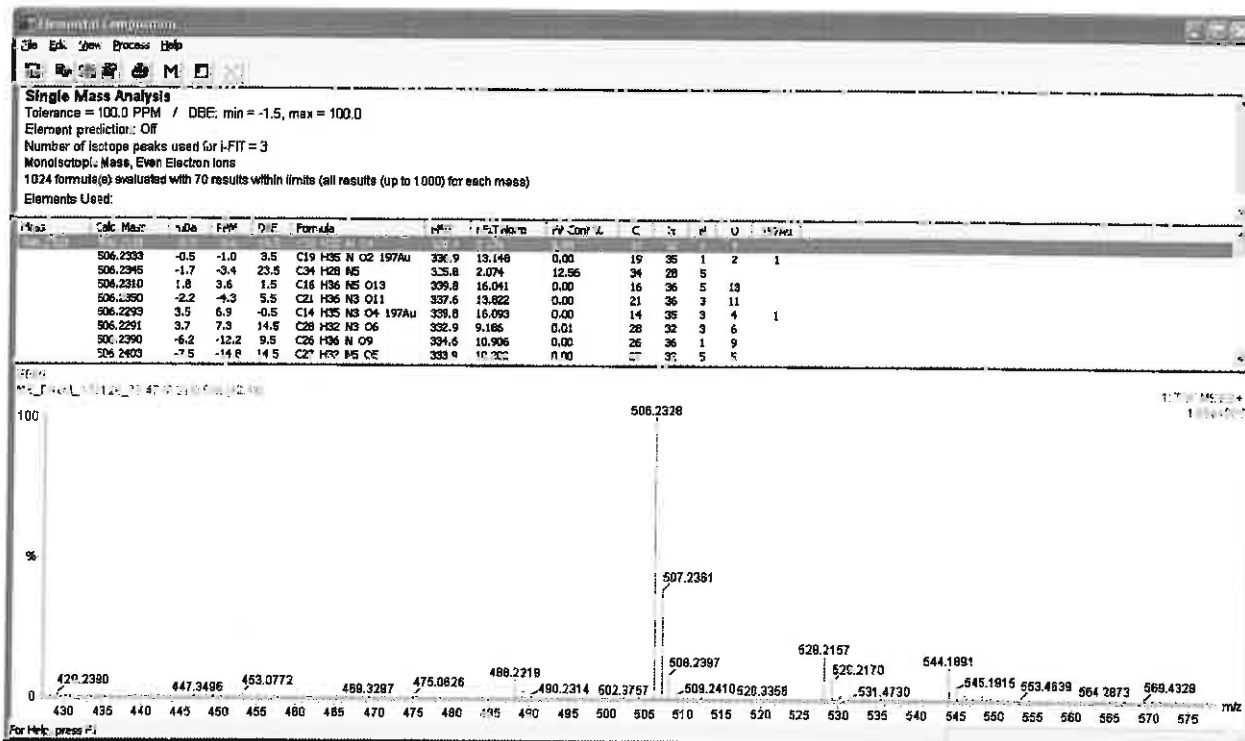

For Help, press F1  
E065  
NIS\_Direct\_151126\_75\_47 (0.218) Cm (42:48)

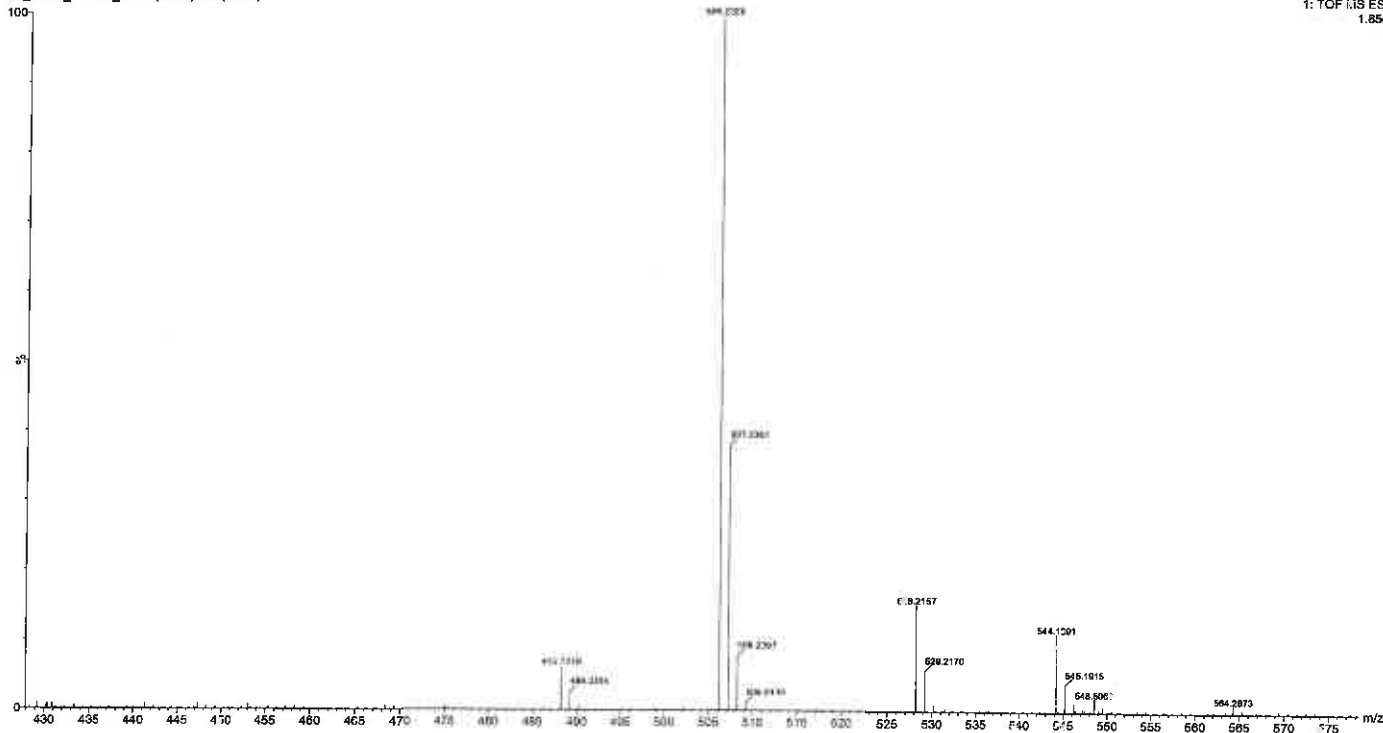

1: TOF MS ES+  
1.85e5

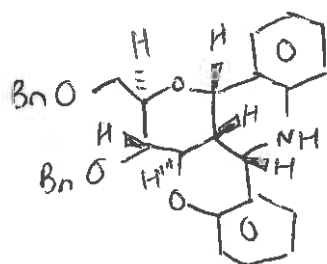

18 M



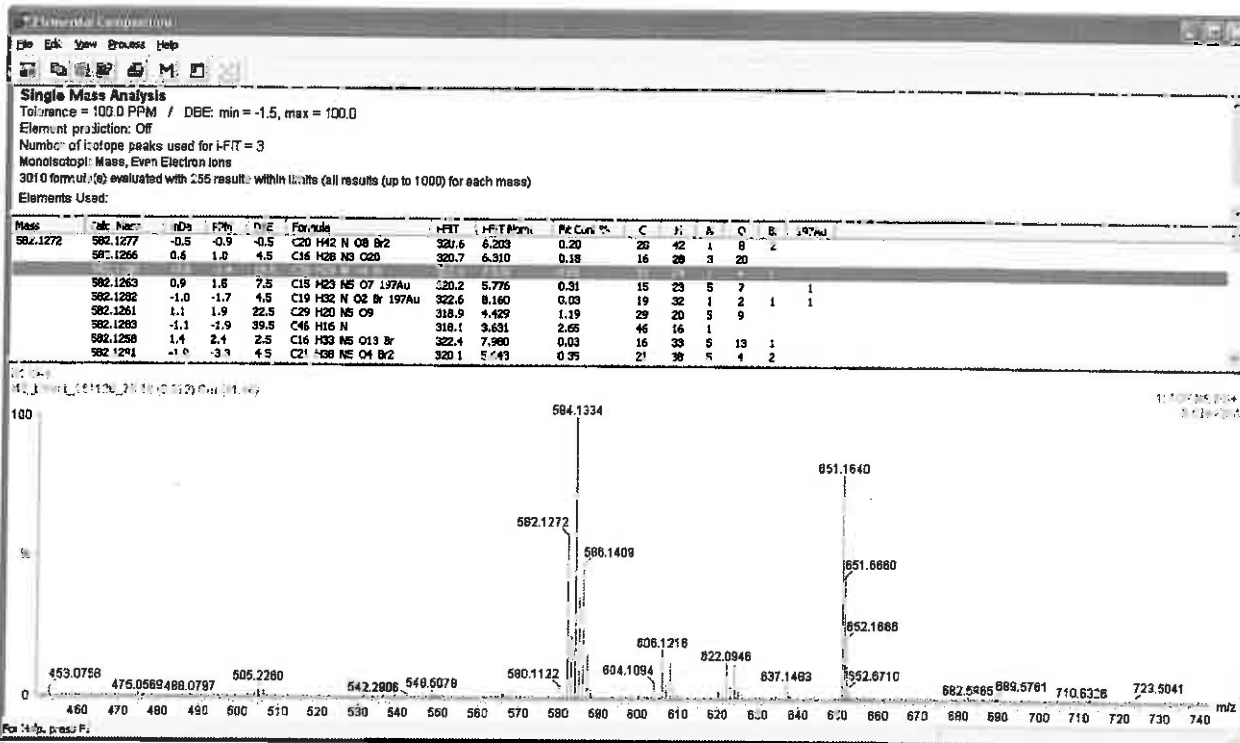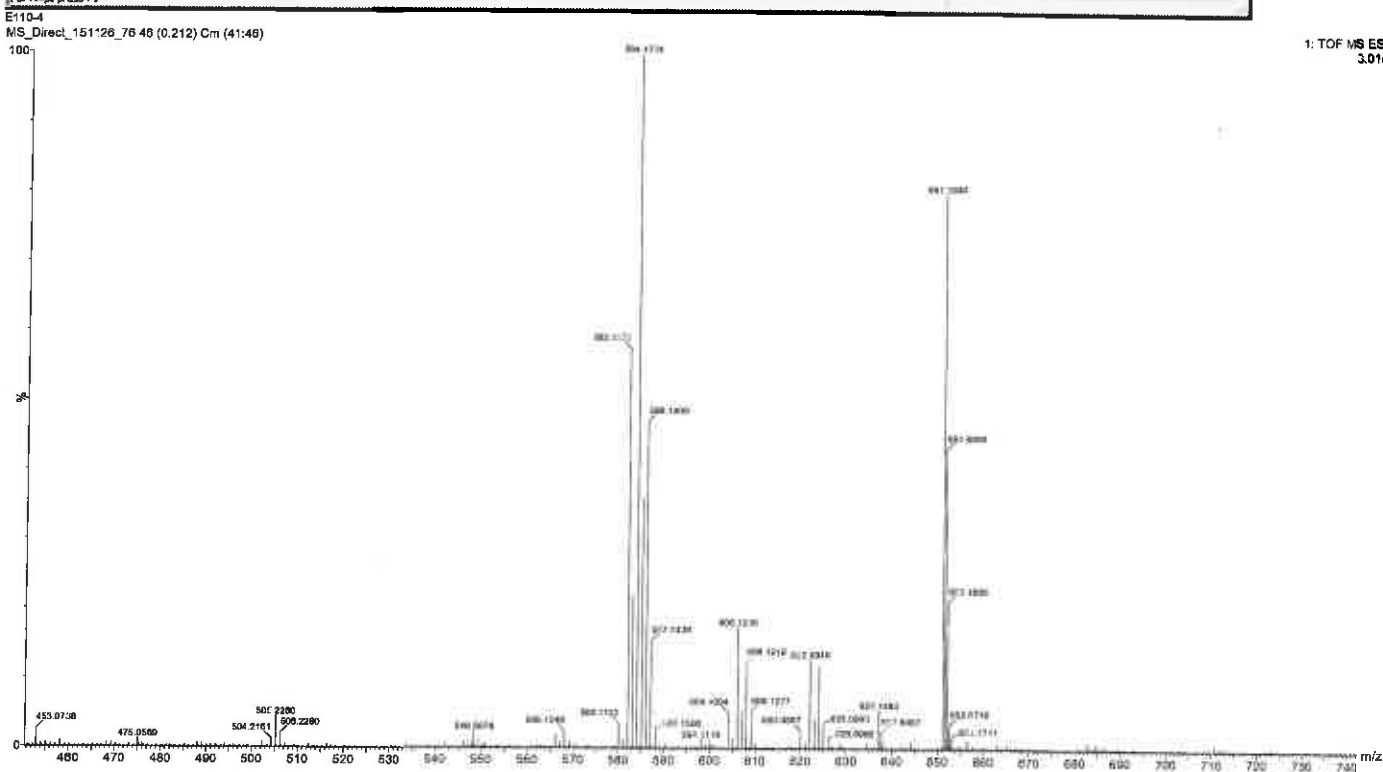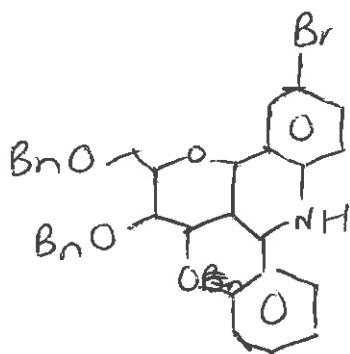

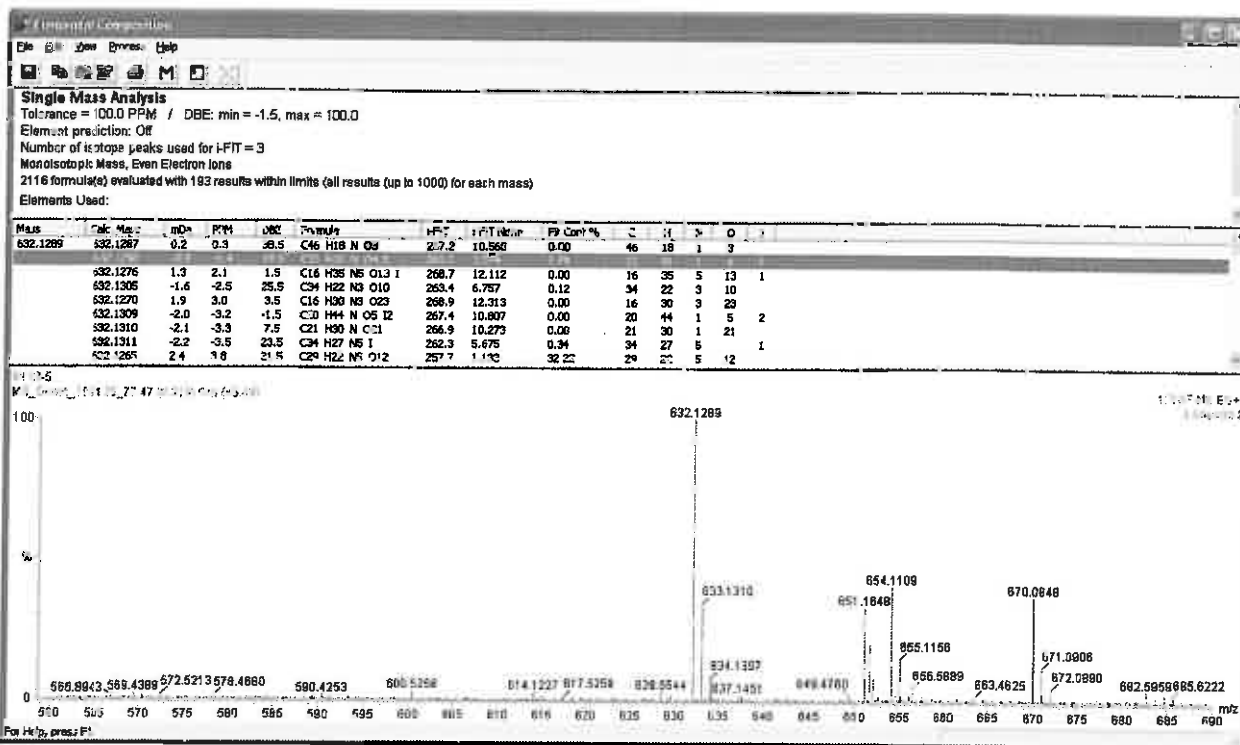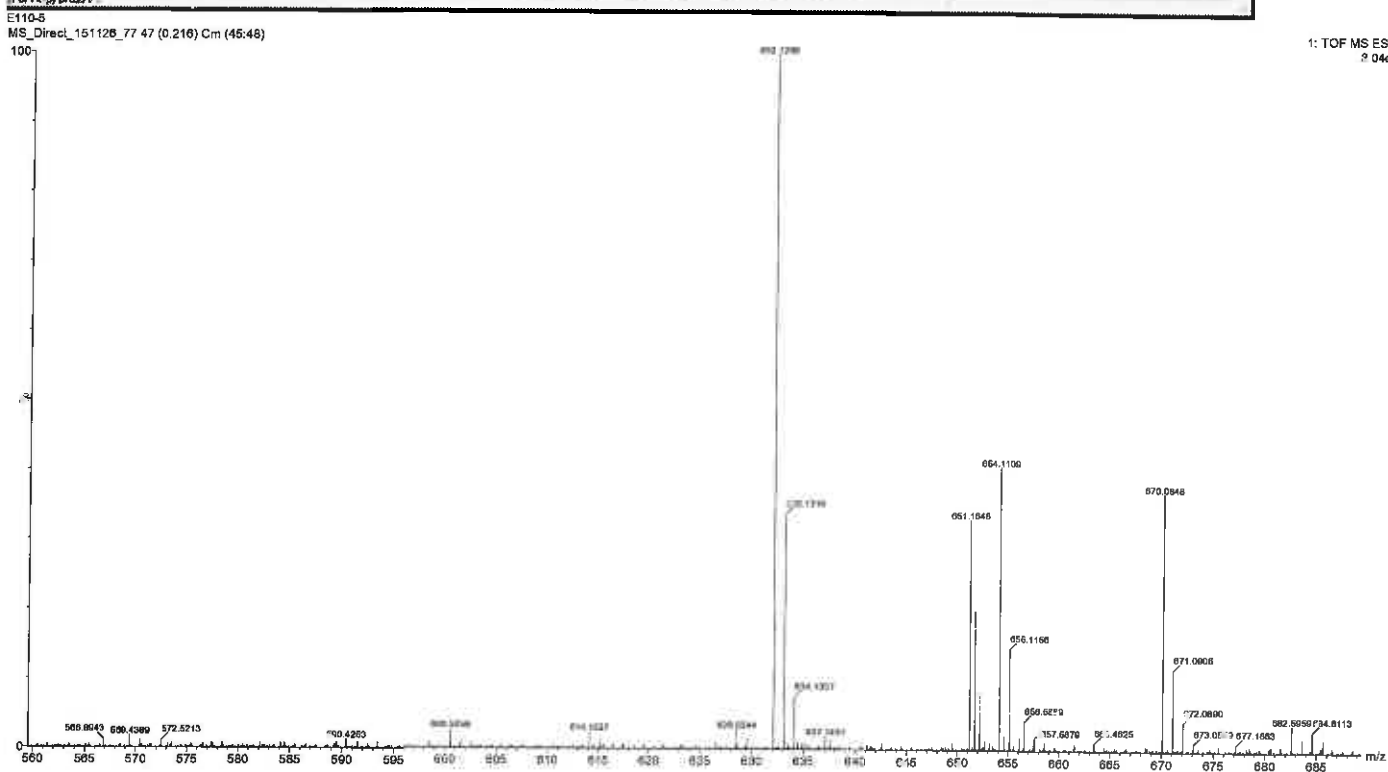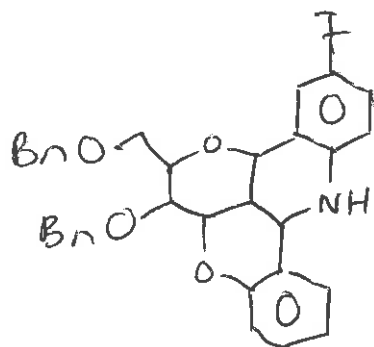

180

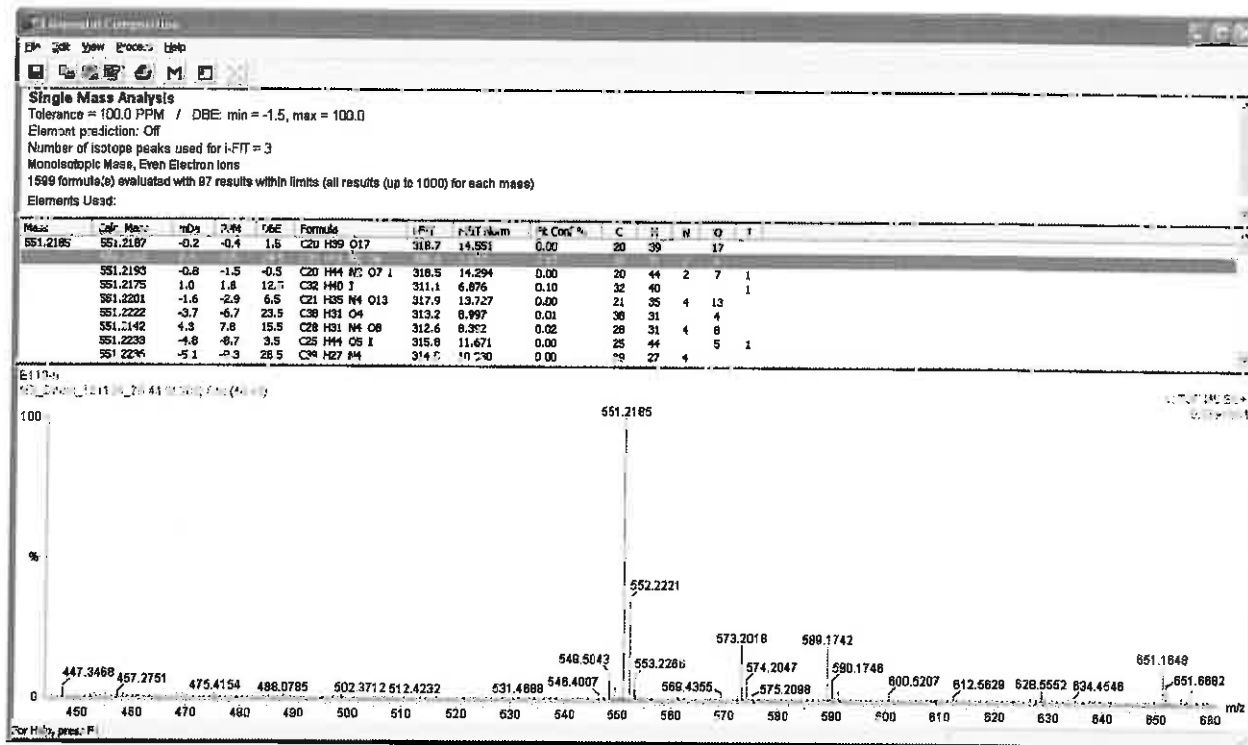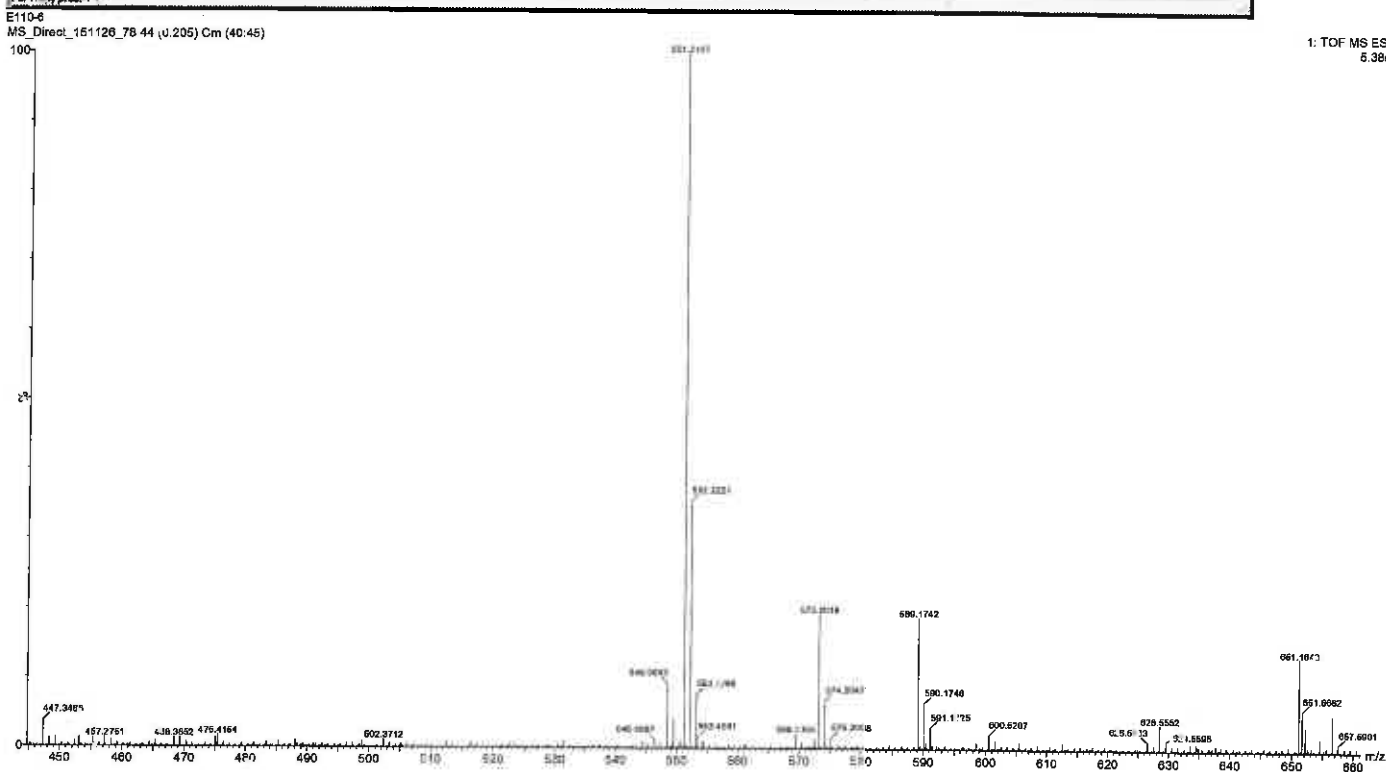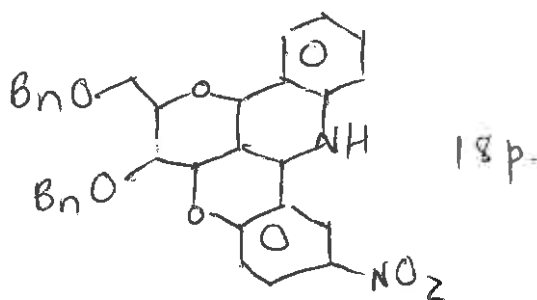

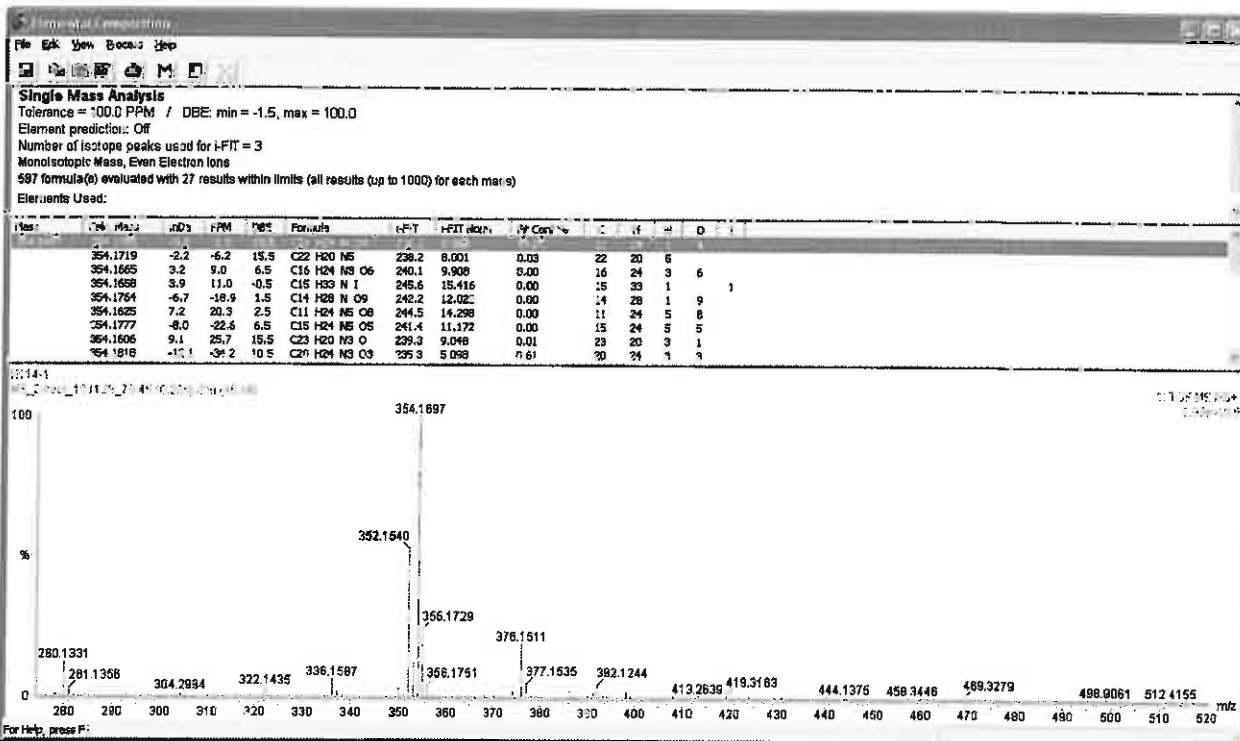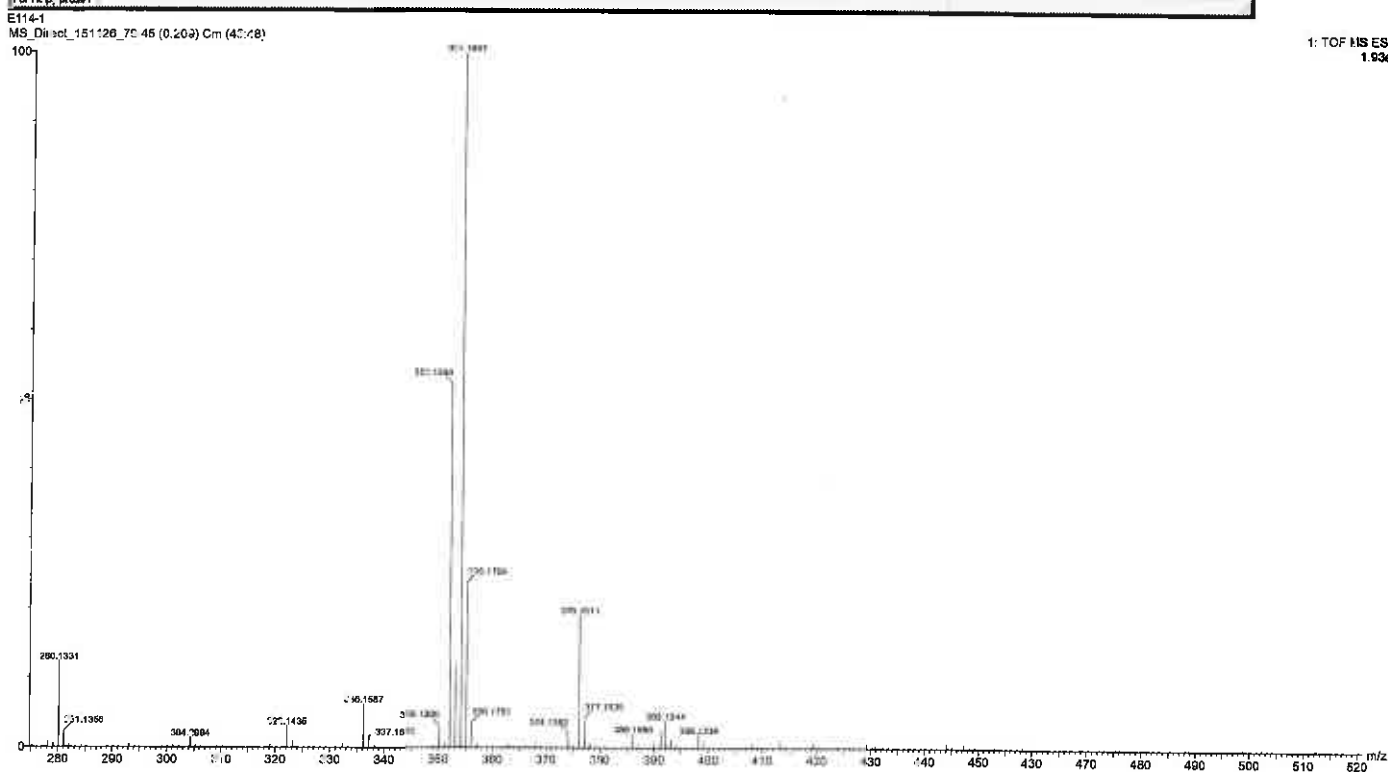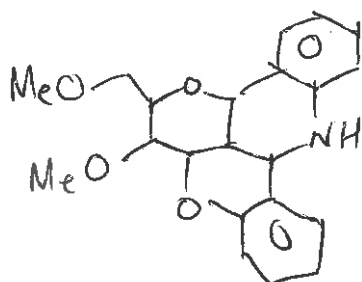

189

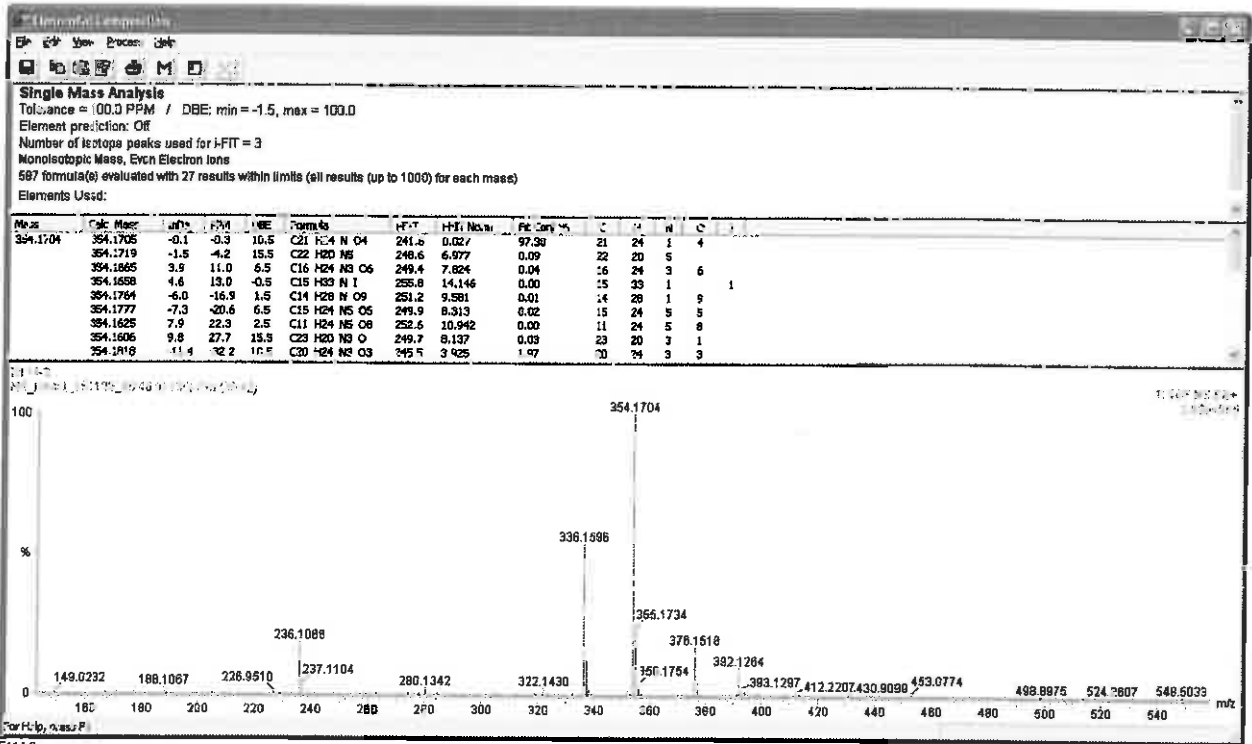

E114-2  
MS\_Direct\_151126\_90 40 (0.180) Cm (39.12)

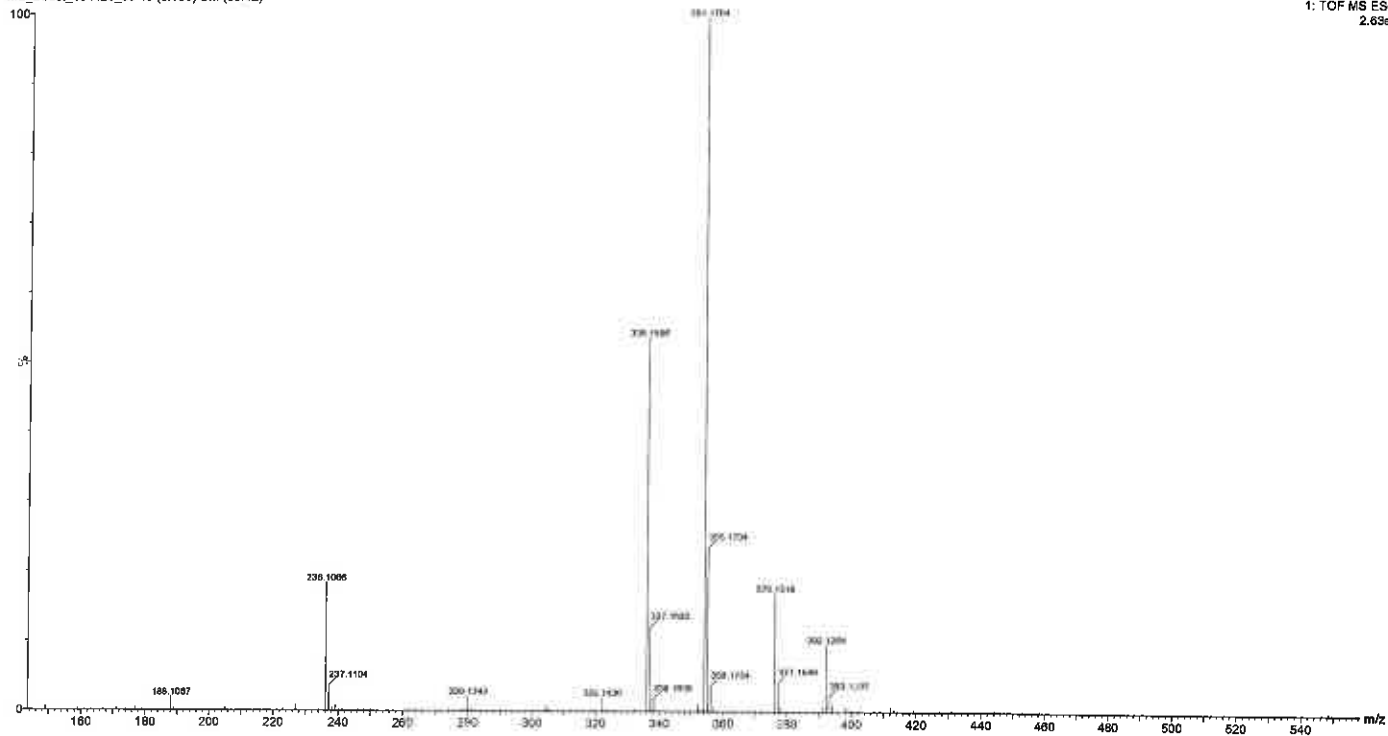

1: TOF MS ES+  
2.63e5

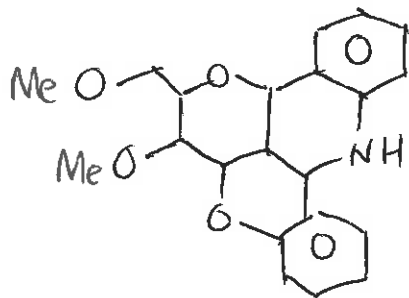

189

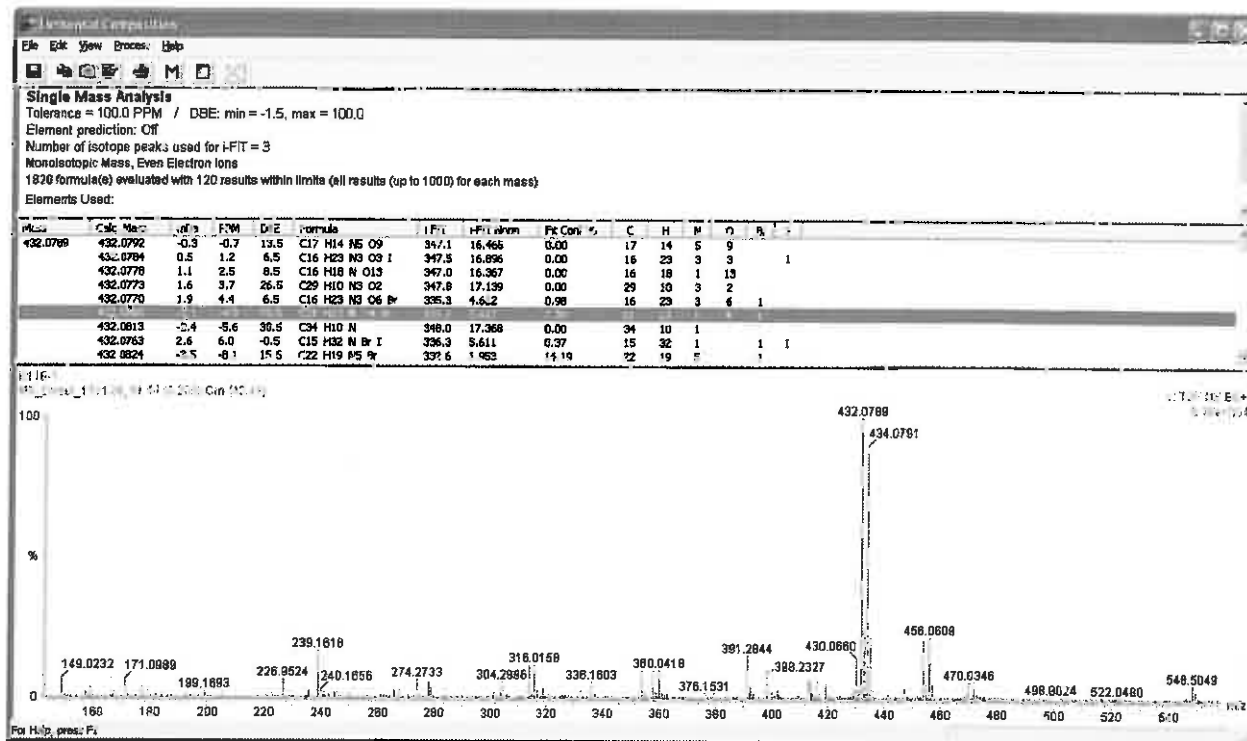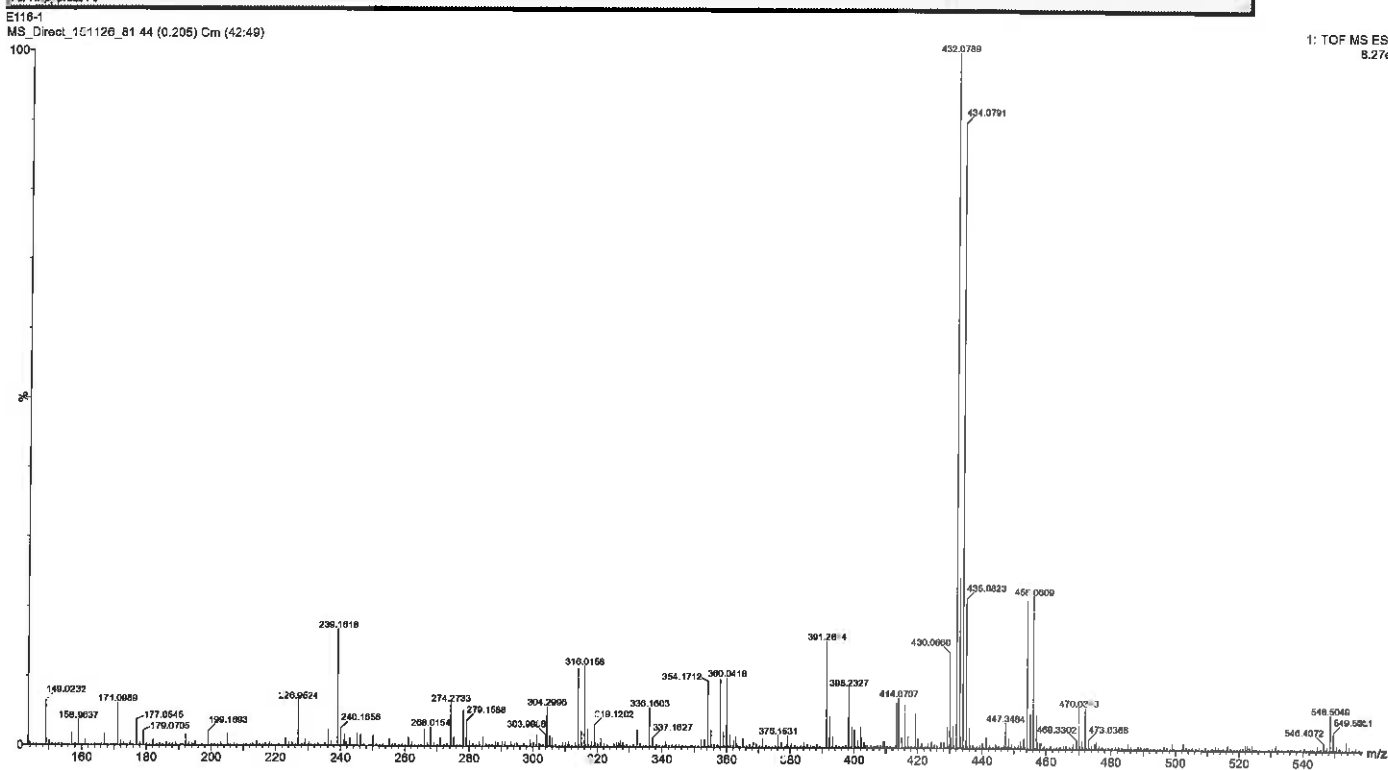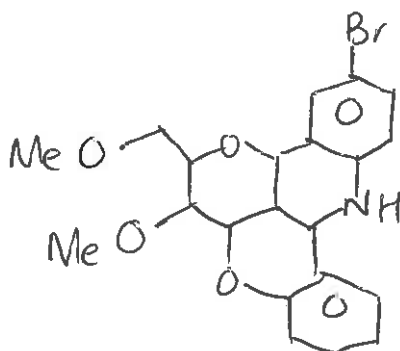

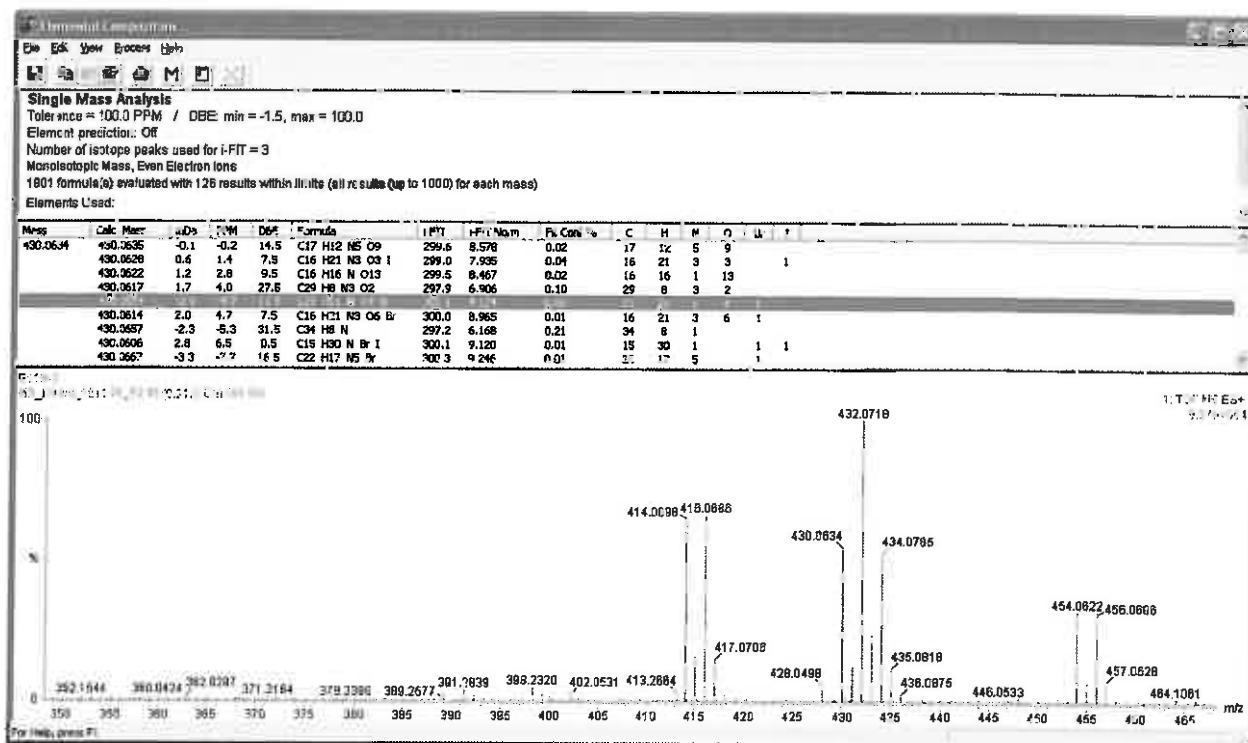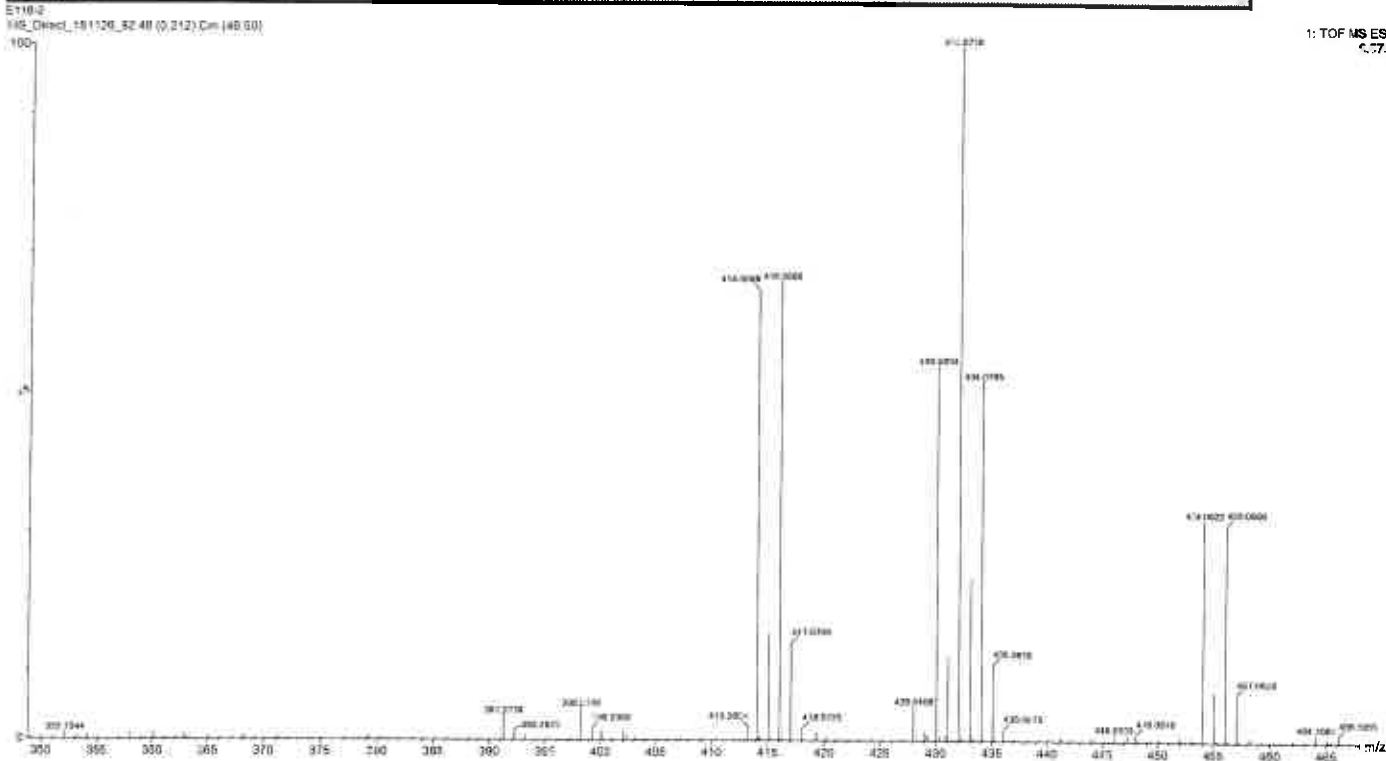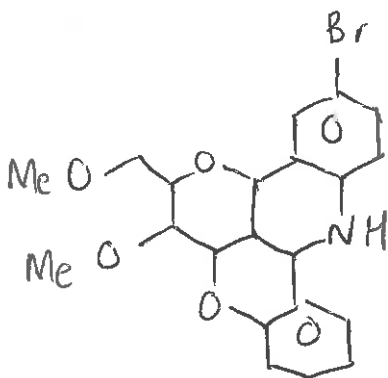

18 r

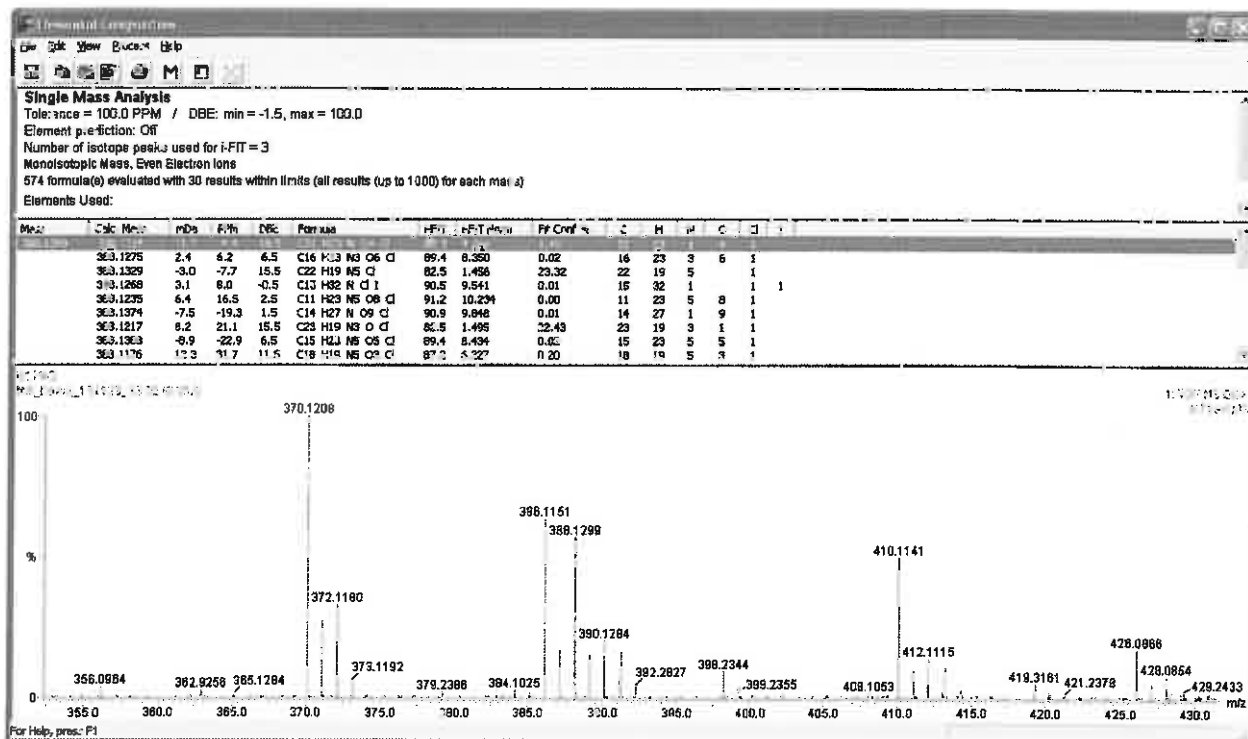

E119-2  
MS\_Direct\_151126\_83 55 (0.25%)

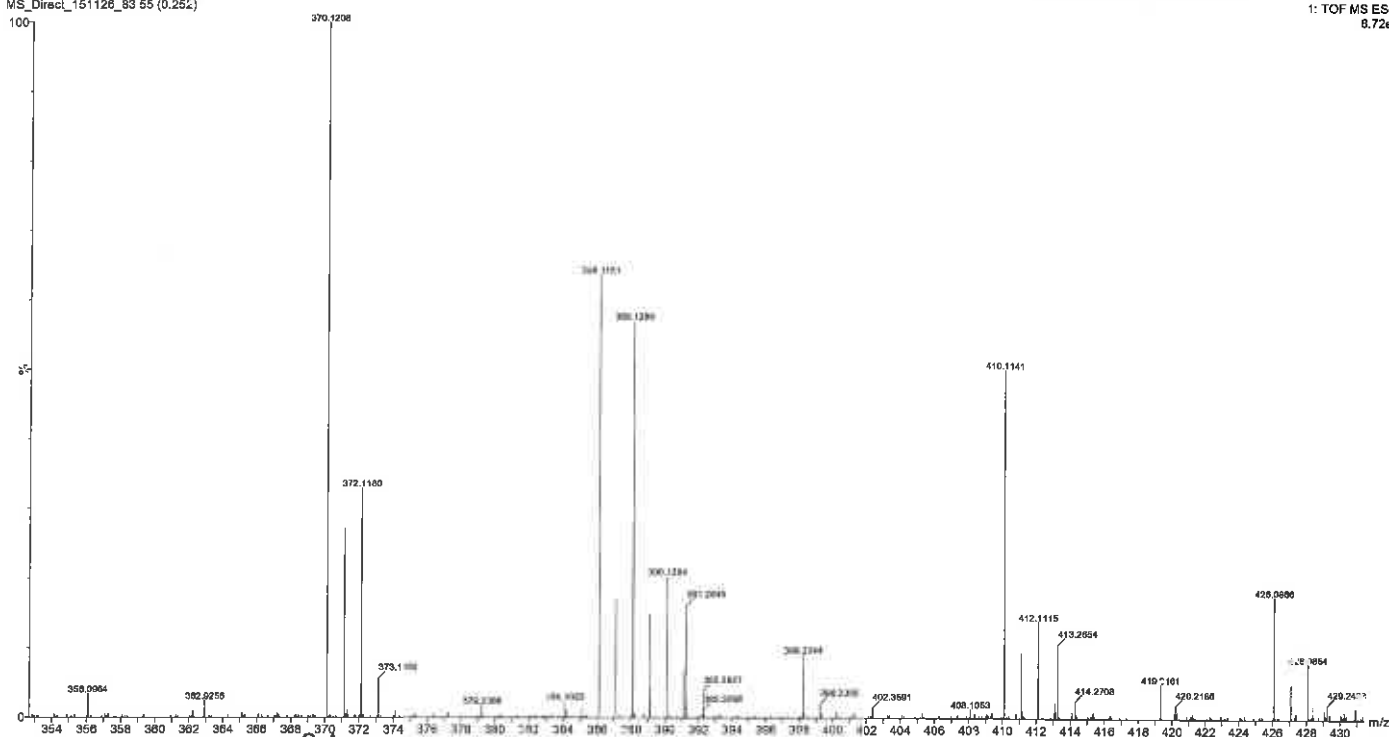

1: TOF MS ES+  
8.72e3

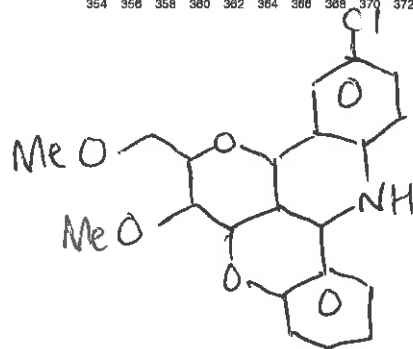

185



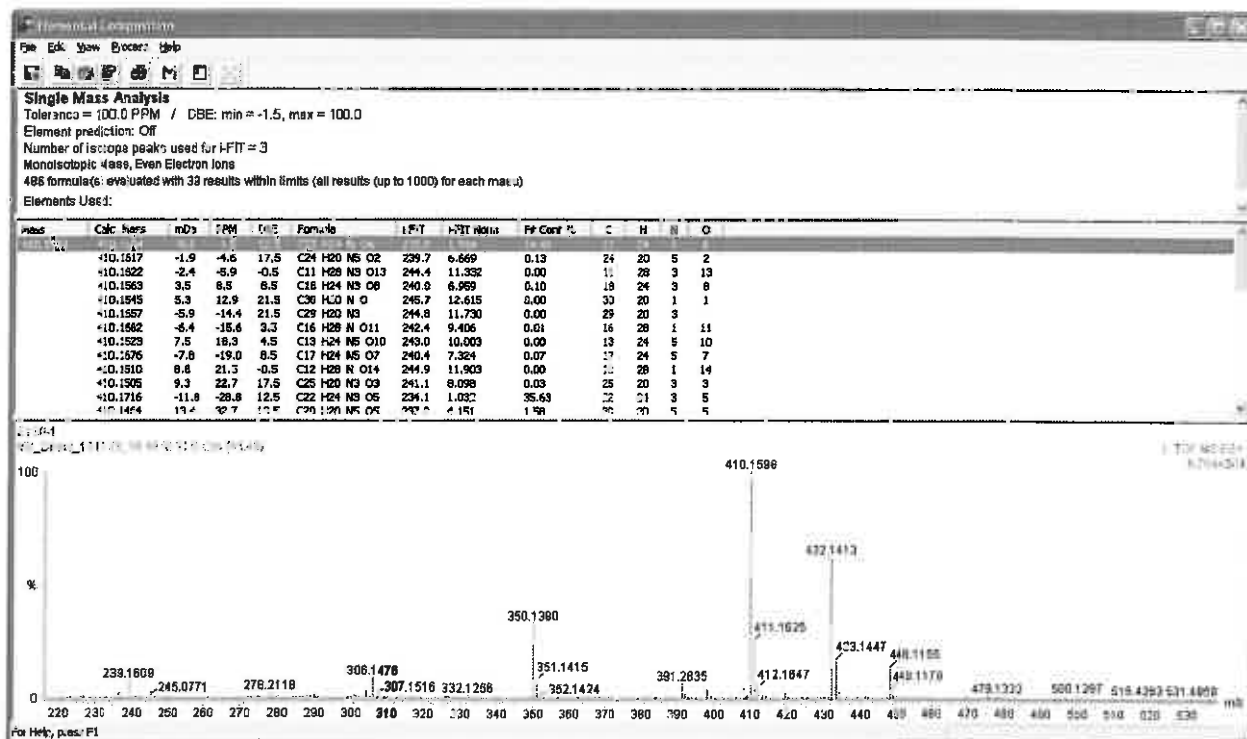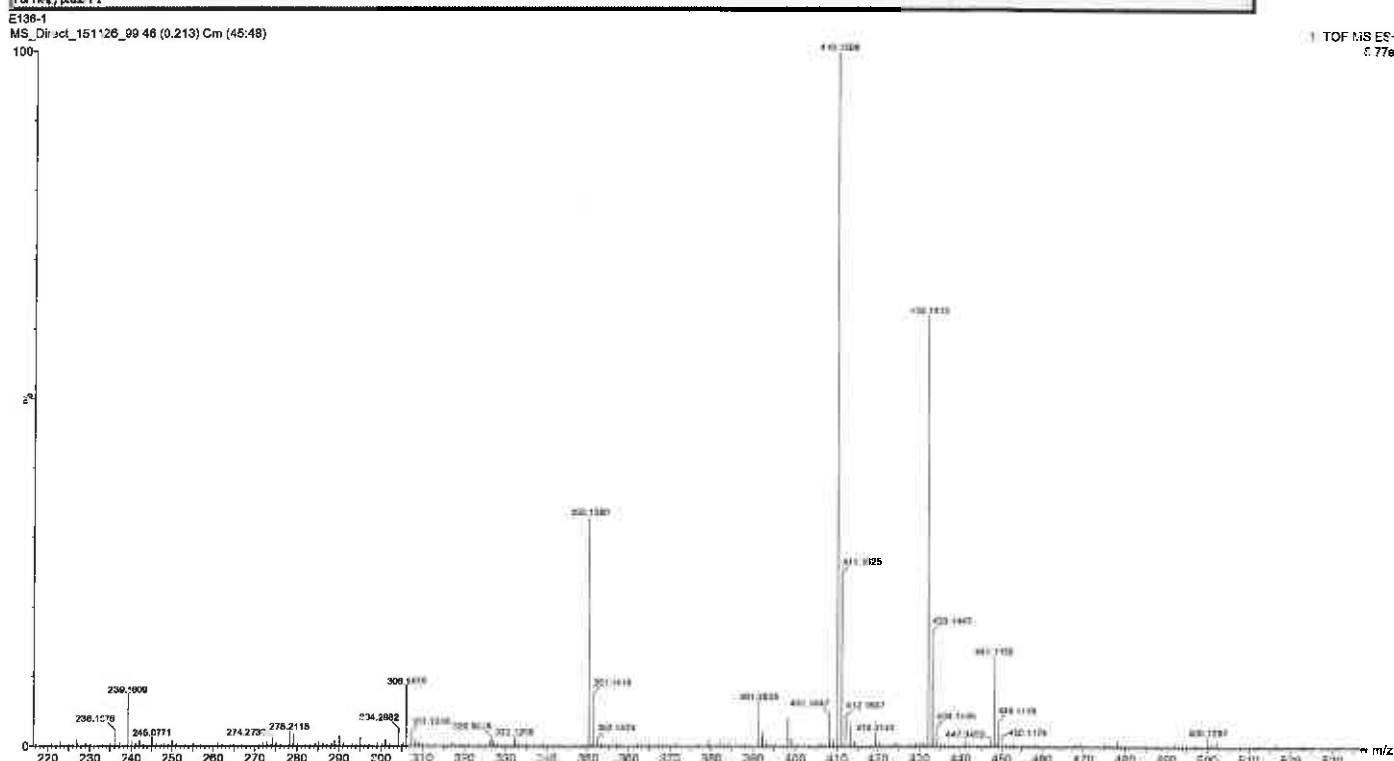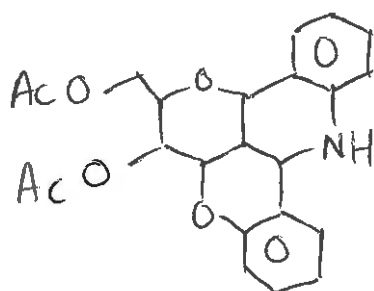

186

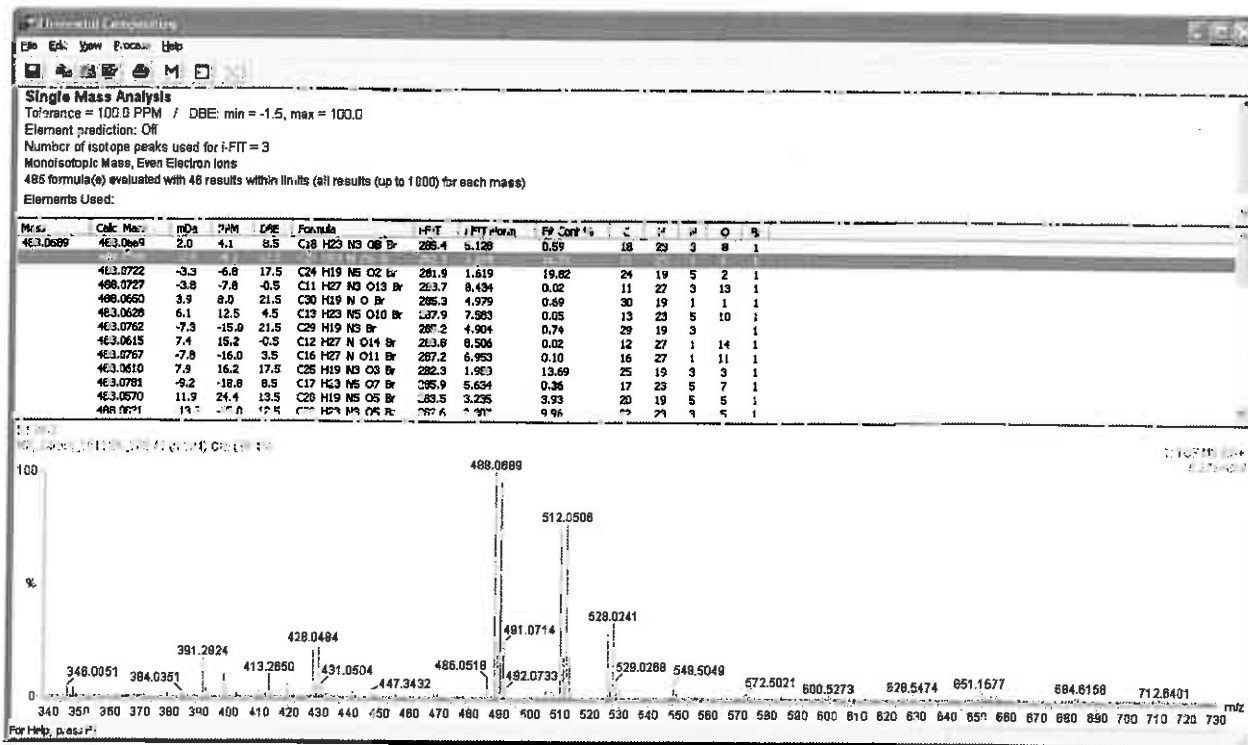

E136-2  
MS\_Direct\_151128\_100\_41 (0.194) Cm (39.45)

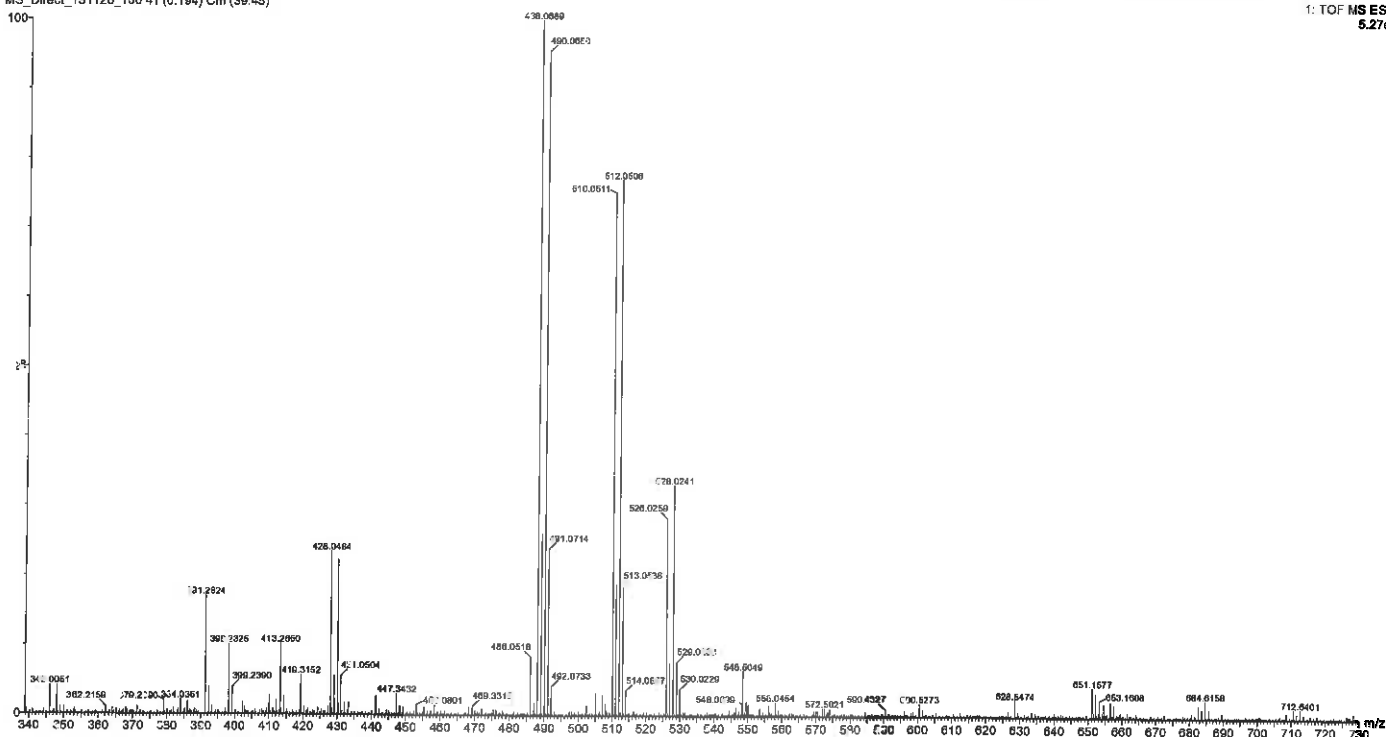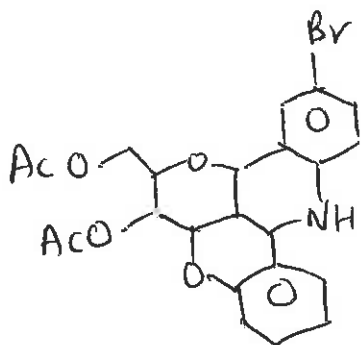

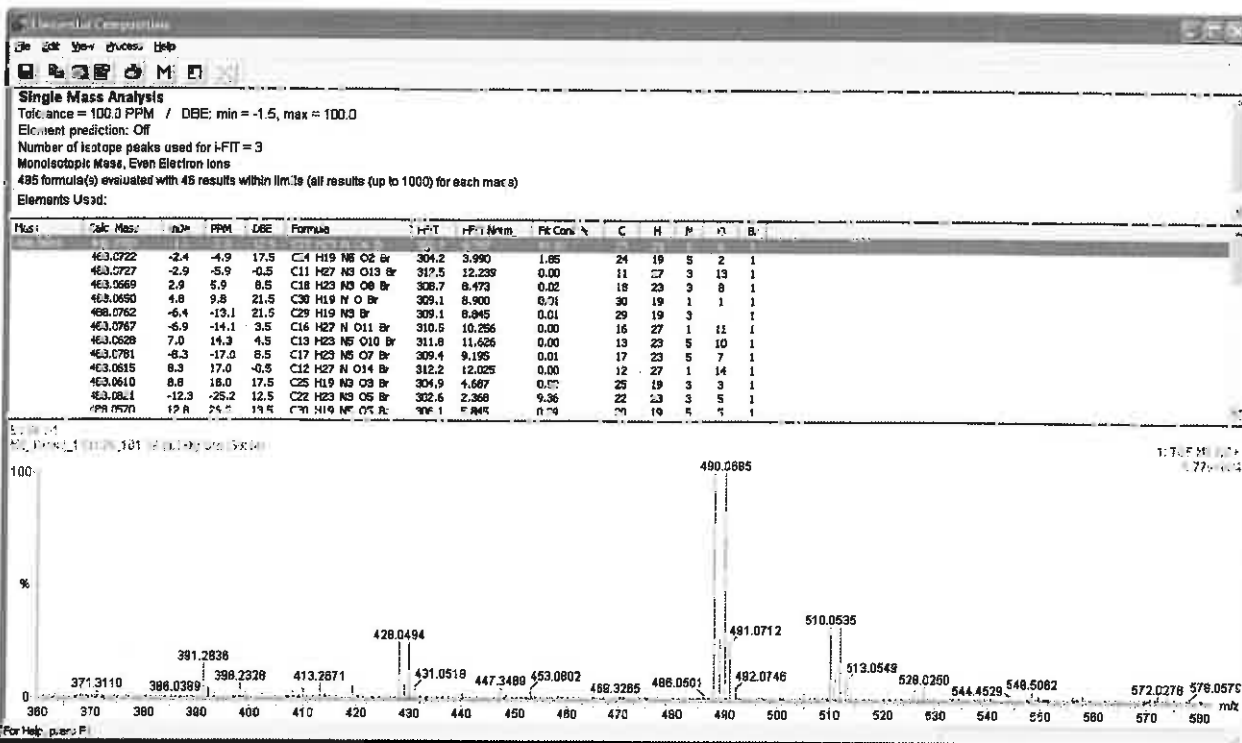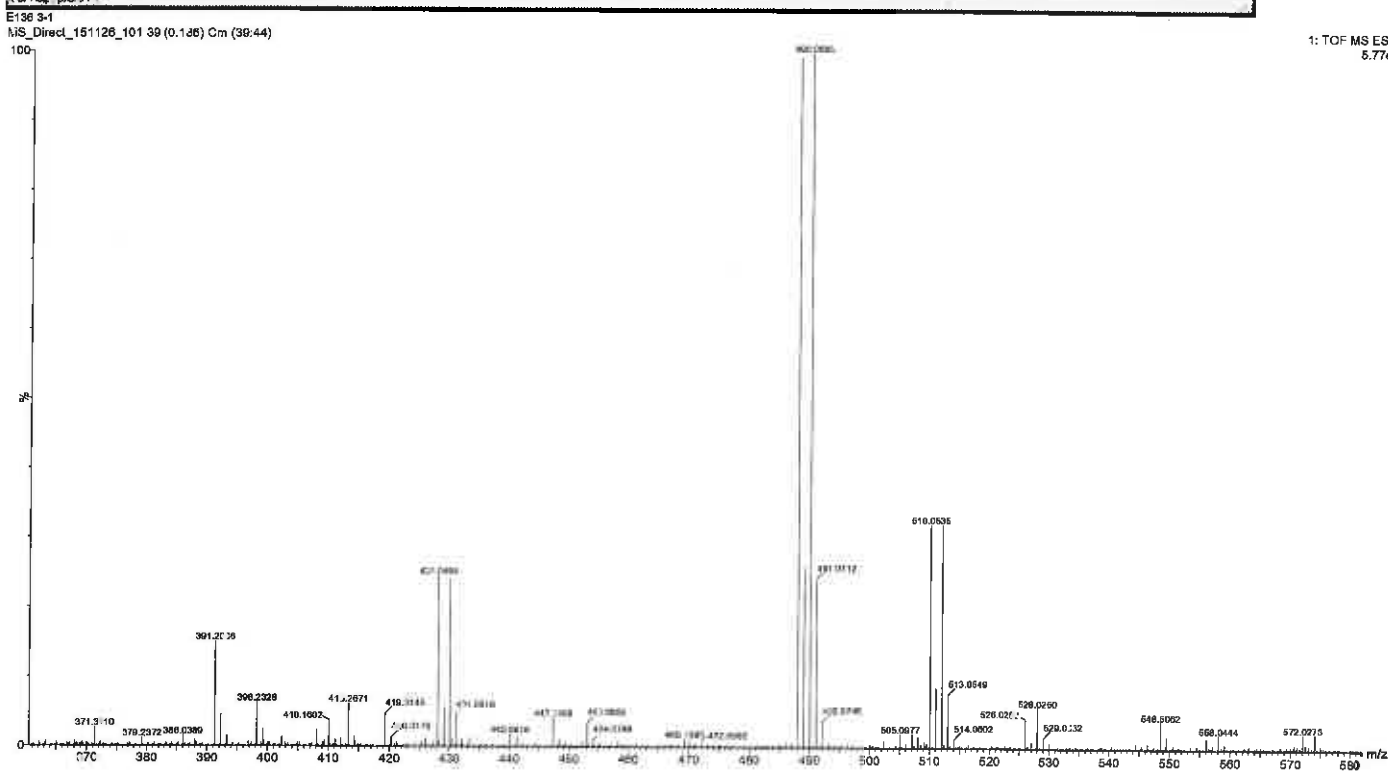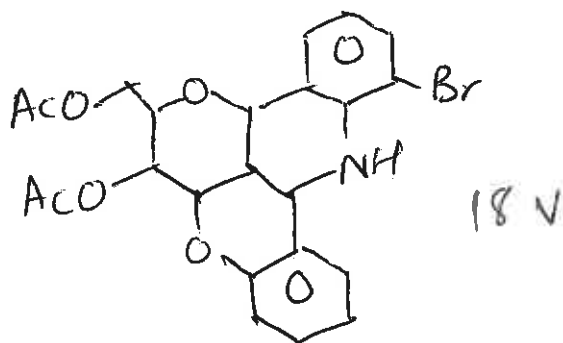

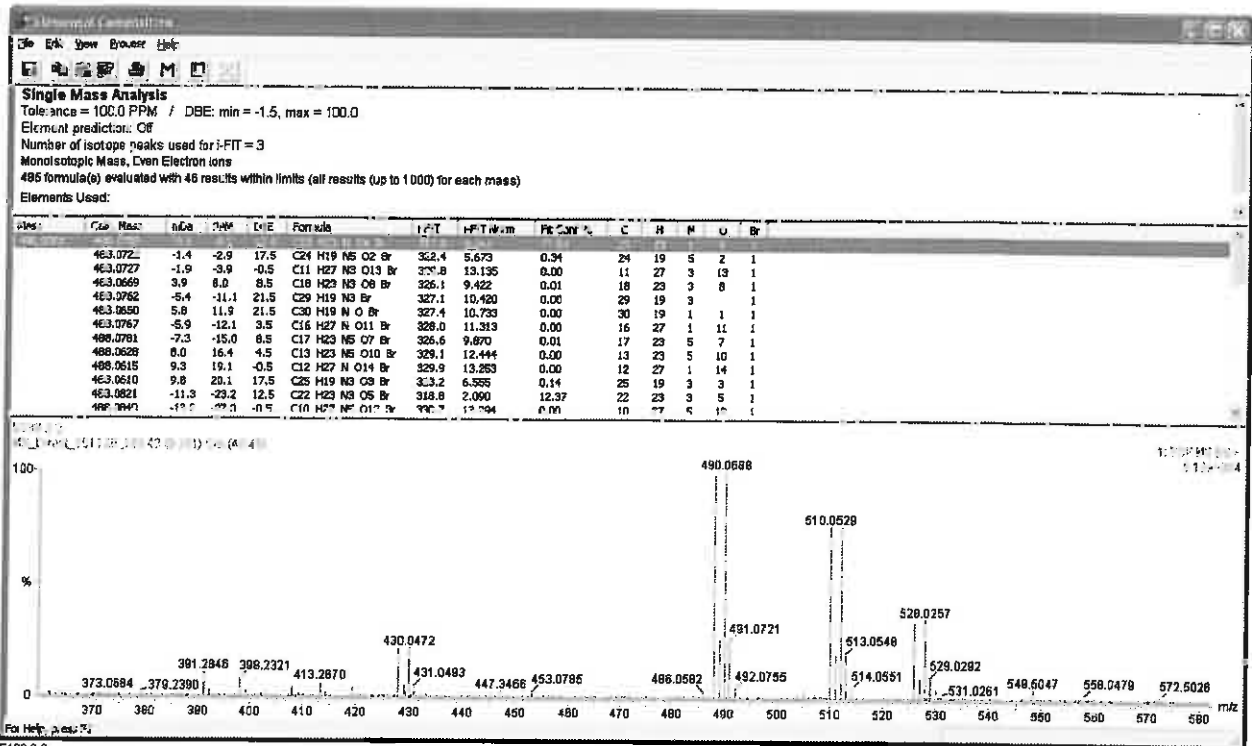

E136 3-2  
MS\_Direct\_181126\_102 43 (0.101) Om (40.45)

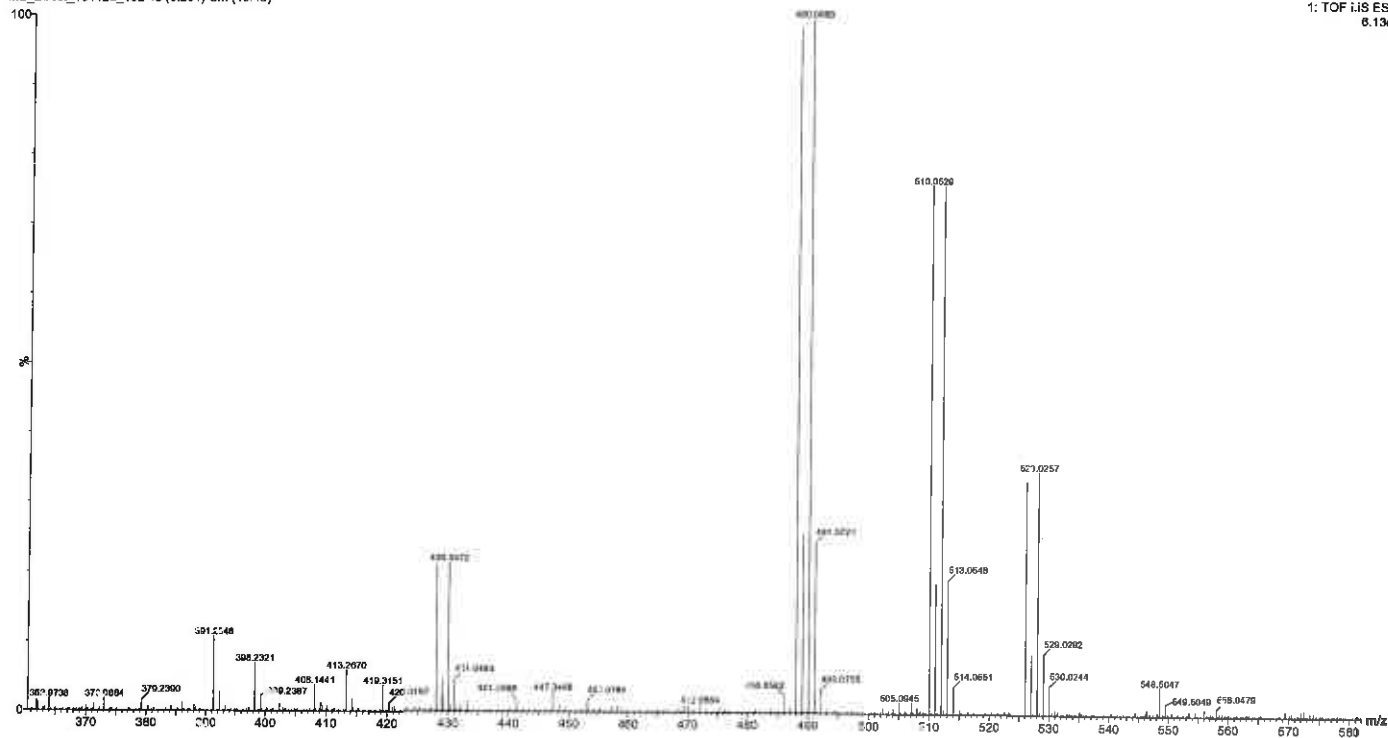

1: TOF LHS ES+  
6.13e4

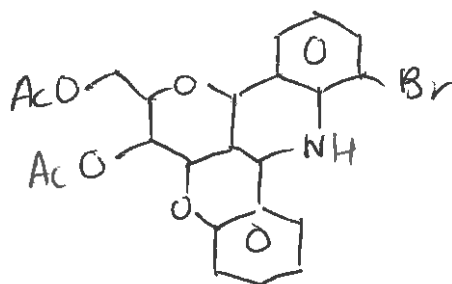

18v
