# Supplementary figures and images for: A convenient domino Ferrier rearrangement-intramolecular cyclization for the synthesis of novel benzopyran-fused pyranoquinolines
Source: Royal Society of Chemistry journal article supplement (doi:10.1039/c5ob02536b), 2016-01-01

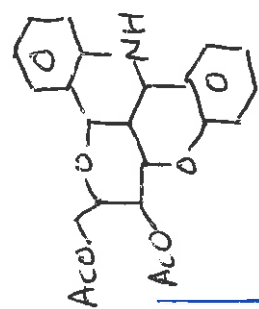

ED-KINQZ-01 4 1 C:\Bruker\TopSpin3.2\data\nmr\nmr

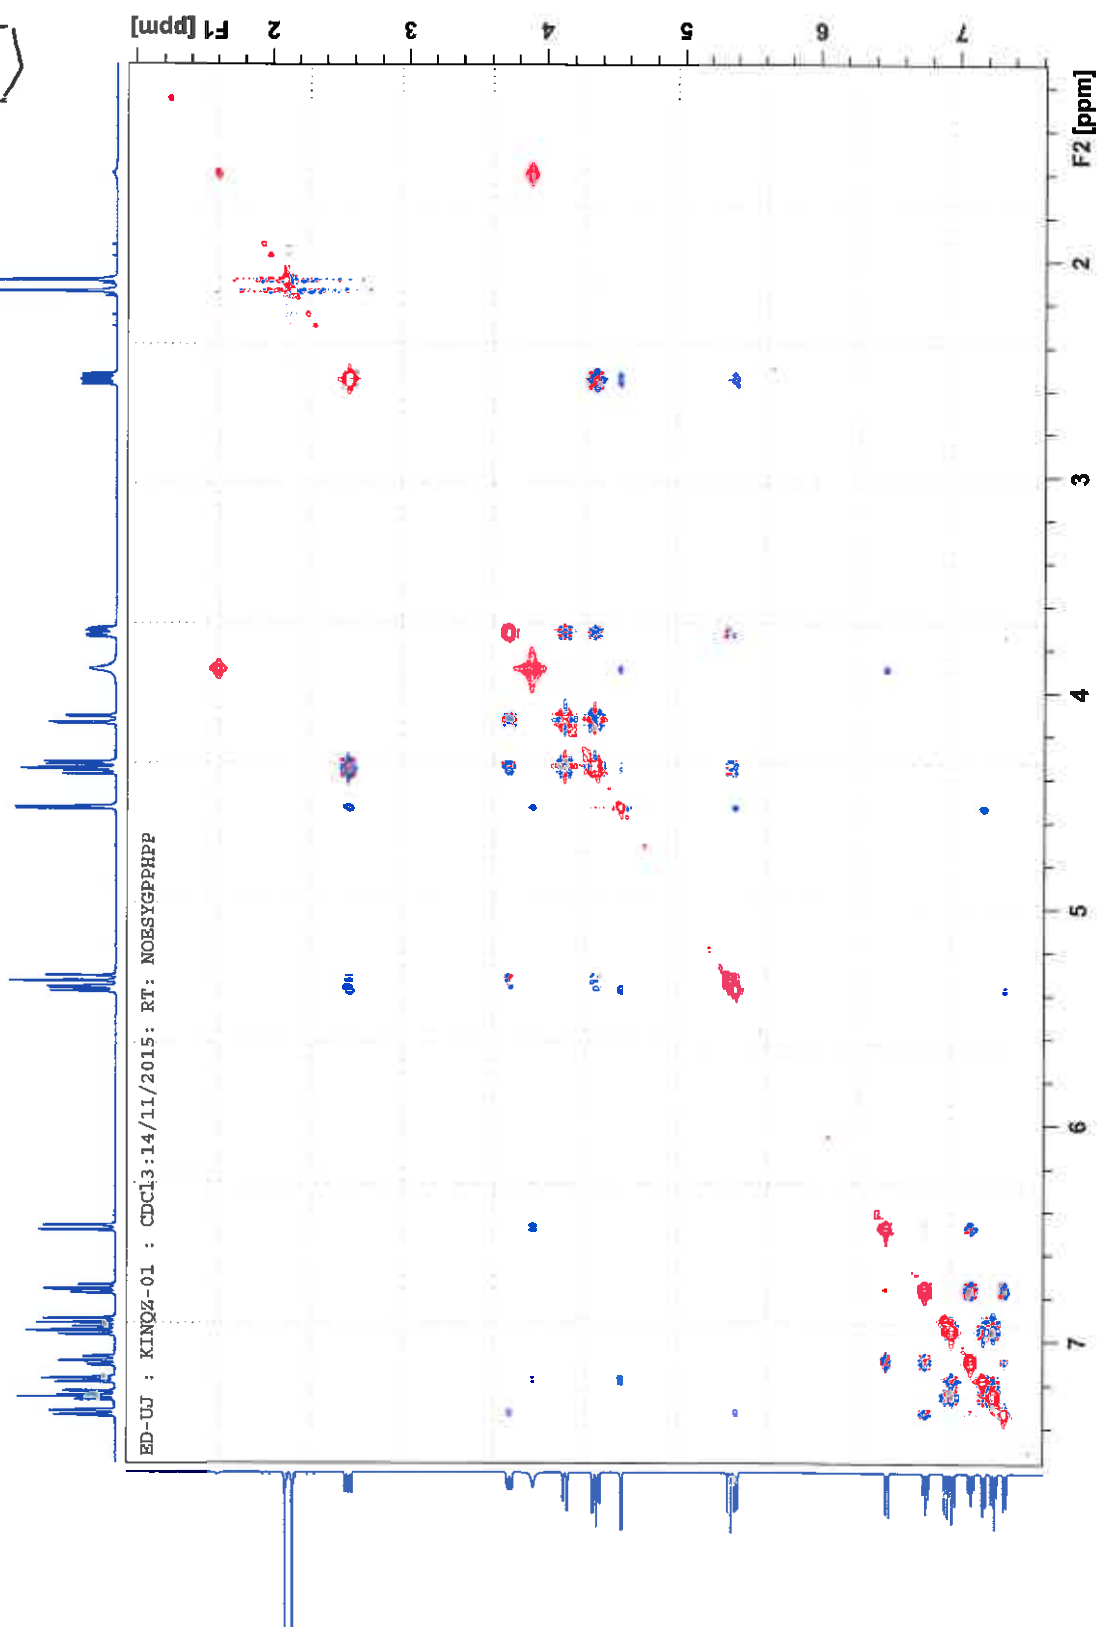

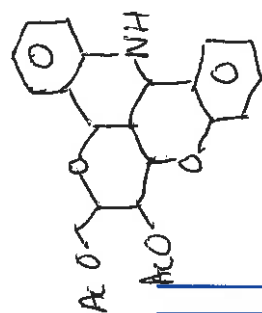

18a

2 S<sub>0</sub> conformer

ED-KINQZ-02 4 1 C:\Bruker\TopSpin3.2\data\nmr\nmr

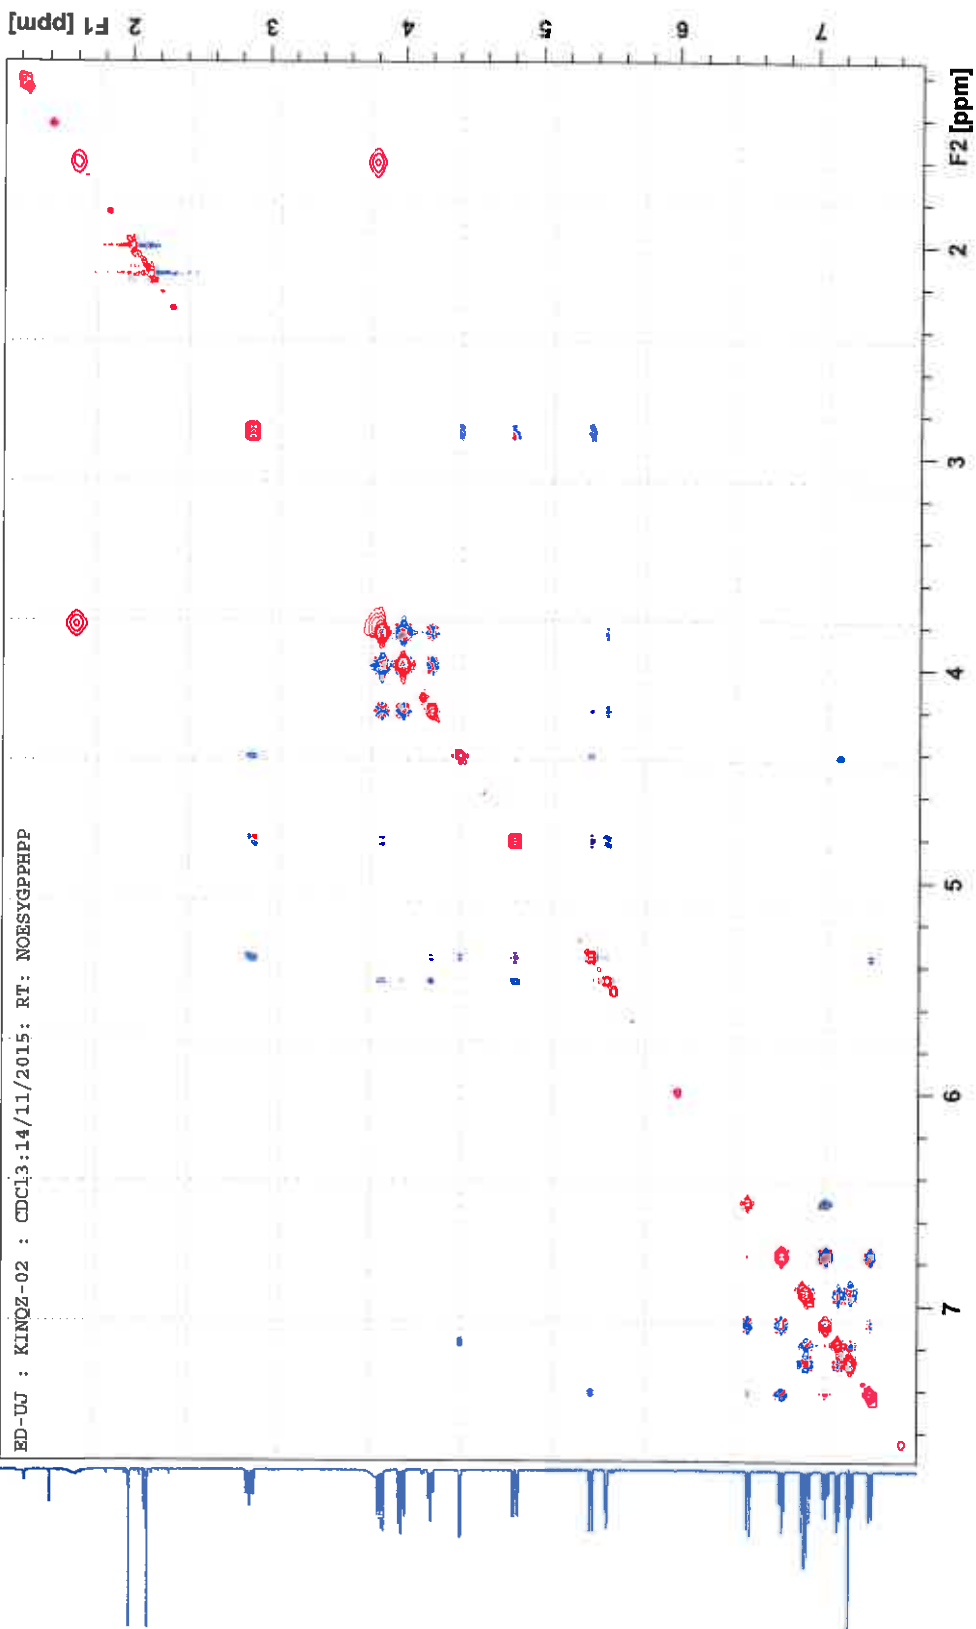

Supplement: c5ob02536b3.pdf [file c5ob02536b3.pdf]
